# Supplementary material for: Impact of a compression garment, on top of the usual care, in patients with breast cancer with early disturbance of the lymphatic transport: protocol of a randomised controlled trial
Source: PubMed Central journal article supplement — BMJ Open. 2020 Dec 4;10(12):e042018. doi: 10.1136/bmjopen-2020-042018 (PMC7722384; doi:10.1136/bmjopen-2020-042018), 2020-12-04
Supplement: bmjopen-2020-042018.draft_revisions.pdf [file bmjopen-2020-042018.draft_revisions.pdf]

# BMJ Open

BMJ Open is committed to open peer review. As part of this commitment we make the peer review history of every article we publish publicly available.

When an article is published we post the peer reviewers' comments and the authors' responses online. We also post the versions of the paper that were used during peer review. These are the versions that the peer review comments apply to.

The versions of the paper that follow are the versions that were submitted during the peer review process. They are not the versions of record or the final published versions. They should not be cited or distributed as the published version of this manuscript.

BMJ Open is an open access journal and the full, final, typeset and author-corrected version of record of the manuscript is available on our site with no access controls, subscription charges or pay-per-view fees (<http://bmjopen.bmj.com>).

If you have any questions on BMJ Open's open peer review process please email [info.bmjopen@bmj.com](mailto:info.bmjopen@bmj.com)

# BMJ Open

**Impact of a compression garment, on top of the usual care, in breast cancer patients with early disturbance of the lymphatic transport: protocol of a randomized controlled trial.**

|                               |                                                                                                                                                                                                                                                                                                                                                                                                     |
|-------------------------------|-----------------------------------------------------------------------------------------------------------------------------------------------------------------------------------------------------------------------------------------------------------------------------------------------------------------------------------------------------------------------------------------------------|
| Journal:                      | <i>BMJ Open</i>                                                                                                                                                                                                                                                                                                                                                                                     |
| Manuscript ID                 | bmjopen-2020-042018                                                                                                                                                                                                                                                                                                                                                                                 |
| Article Type:                 | Protocol                                                                                                                                                                                                                                                                                                                                                                                            |
| Date Submitted by the Author: | 24-Jun-2020                                                                                                                                                                                                                                                                                                                                                                                         |
| Complete List of Authors:     | thomis, sarah; KU Leuven University Hospitals Leuven, Vascular Surgery<br>Devoogdt, Nele; KU Leuven, Rehabilitation Sciences<br>Bechter-Hugl, Beate; KU Leuven University Hospitals Leuven, Vascular Surgery<br>Nevelsteen, Ines; KU Leuven University Hospitals Leuven, Vascular Surgery<br>Neven, P.; Univ Hosp Leuven<br>Fourneau, Inge; KU Leuven University Hospitals Leuven, Vascular Surgery |
| Keywords:                     | Breast tumours < ONCOLOGY, Cardiovascular imaging < RADIOLOGY & IMAGING, Vascular surgery < SURGERY                                                                                                                                                                                                                                                                                                 |
|                               |                                                                                                                                                                                                                                                                                                                                                                                                     |

SCHOLARONE™  
Manuscripts

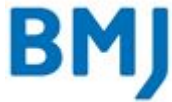

I, the Submitting Author has the right to grant and does grant on behalf of all authors of the Work (as defined in the below author licence), an exclusive licence and/or a non-exclusive licence for contributions from authors who are: i) UK Crown employees; ii) where BMJ has agreed a CC-BY licence shall apply, and/or iii) in accordance with the terms applicable for US Federal Government officers or employees acting as part of their official duties; on a worldwide, perpetual, irrevocable, royalty-free basis to BMJ Publishing Group Ltd ("BMJ") its licensees and where the relevant Journal is co-owned by BMJ to the co-owners of the Journal, to publish the Work in this journal and any other BMJ products and to exploit all rights, as set out in our [licence](#).

The Submitting Author accepts and understands that any supply made under these terms is made by BMJ to the Submitting Author unless you are acting as an employee on behalf of your employer or a postgraduate student of an affiliated institution which is paying any applicable article publishing charge ("APC") for Open Access articles. Where the Submitting Author wishes to make the Work available on an Open Access basis (and intends to pay the relevant APC), the terms of reuse of such Open Access shall be governed by a Creative Commons licence – details of these licences and which [Creative Commons](#) licence will apply to this Work are set out in our licence referred to above.

Other than as permitted in any relevant BMJ Author's Self Archiving Policies, I confirm this Work has not been accepted for publication elsewhere, is not being considered for publication elsewhere and does not duplicate material already published. I confirm all authors consent to publication of this Work and authorise the granting of this licence.

1  
2  
3 **Impact of a compression garment, on top of the usual care, in breast cancer**  
4 **patients with early disturbance of the lymphatic transport: protocol of a**  
5 **randomized controlled trial.**  
6  
7

8 Sarah Thomis<sup>1,2</sup>, Nele Devoogdt<sup>1,3</sup>, Beate Bechter-Hugl<sup>1</sup>, Ines Nevelsteen<sup>4</sup>, Patrick Neven<sup>4</sup>, Inge  
9 Fourneau<sup>1,2</sup>  
10

11  
12  
13 <sup>1</sup>UZ Leuven – University Hospitals Leuven, Department of Vascular Surgery, Centre for Lymphedema,  
14 Leuven, Belgium

15  
16 <sup>2</sup>KU Leuven – University of Leuven, Department of Cardiovascular Sciences, Research unit Vascular  
17 Surgery, Leuven, Belgium

18  
19 <sup>3</sup>KU Leuven – University of Leuven, Department of Rehabilitation Sciences, Leuven, Belgium

20  
21 <sup>4</sup>UZ Leuven – University Hospitals Leuven, Multidisciplinary Breast Centre, Leuven, Belgium  
22  
23

24 **Corresponding author:**

25 Sarah Thomis, MD

26 University Hospitals Leuven

27 Department of Vascular Surgery – Center for lymphedema

28 Herestraat 49

29 3000 Leuven

30 Belgium

31 Email: [sarah.thomis@uzleuven.be](mailto:sarah.thomis@uzleuven.be)

32 Tel : +3216346948

33 Fax : +3216346852  
34  
35

36  
37  
38  
39  
40  
41  
42  
43  
44  
45  
46  
47  
48  
49  
50  
51  
52  
53  
54  
55  
56  
57  
58  
59  
60  
Word count: 3170

## ABSTRACT

### Introduction

Breast-cancer related lymphedema (BCRL) is a common phenomenon. When lymphedema is diagnosed late, options for treatment are diminished. Therefore, early diagnosis and treatment are very important to alter the potential deleterious evolution. Lymphofluoroscopy visualizes the superficial lymphatic architecture in detail, giving the opportunity to detect a disturbance in the lymphatic transport (i.e. dermal backflow) before the lymphedema is clinically visible.

The main objective is to investigate if there is an additional effect of a compression garment on top of the usual care (i.e. information and exercises) in patients with early disturbance of the lymphatic transport after breast cancer treatment. Development of clinical lymphedema and/or deterioration of the dermal backflow visualized by lymphofluoroscopy is investigated.

### Methodology

All patients scheduled for breast cancer surgery with unilateral axillary lymph node dissection or sentinel node biopsy in the Multidisciplinary Breast Clinic of the University Hospitals Leuven are being considered. Patients are assessed before surgery and at 1, 3, 6, 9, 12, 18, 24 and 36 months postoperatively. At each visit a clinical assessment is performed determining the volume difference between both arms and hands (through circumference measurements and water displacement), the water content, the extracellular fluid, the pitting status and the skinfold thickness. Quality of life questionnaires are filled in. At each visit a lymphofluoroscopy is performed as well. When a disturbance of the lymphatic transport is seen on lymphofluoroscopy, without the presence of clinical lymphedema, the patient is randomized in either a control group receiving usual care or a preventive treatment group receiving usual care and a compression garment (whether or not combined with a glove).

### Conclusion

1  
2  
3 The investigators hypothesize that development of clinical BCRL can be prevented and/or the dermal  
4  
5 backflow can be stabilized or improved, if a preventive treatment with compression garment is started  
6  
7 in the early phase of disturbance.  
8  
9

## 10 11 12 13 14 15 16 17 18 19 **SUMMARY**

20  
21  
22 Early diagnosis and treatment is very important to alter the normal evolution of BCRL.

23  
24 Lymphofluoroscopy and clinical measurements are performed at regular times after the surgery for  
25  
26 breast cancer.

27  
28 Lymphofluoroscopy gives the opportunity to detect a disturbance in the lymphatic transport before  
29  
30 the lymphedema is clinically visible.

31  
32 When an early disturbance is seen, patients are randomized into two groups.

33  
34 The investigators hypothesize that development of clinical BCRL can be prevented and/or the dermal  
35  
36 backflow can be stabilized or improved, if a preventive treatment with compression garment is started  
37  
38 in the early phase of disturbance.  
39  
40

41  
42  
43  
44  
45  
46  
47  
48 **Key words:** Lymphedema, clinical measurements, ICG lymphofluoroscopy, near-infrared fluorescence,  
49  
50 diagnostic imaging, early detection  
51  
52  
53  
54  
55  
56  
57  
58  
59  
60

## INTRODUCTION

Lymphedema is a chronic and debilitating disease caused by imbalance between lymph production and lymph transport. It reduces patient's quality of life by limb enlargement but also by other physical and psychosocial problems, e.g. decreased mobility, recurrent infections, stress and decreased ability to perform occupational activities.<sup>1,2</sup>

Breast cancer-related lymphedema (BCRL) is a secondary lymphedema of the upper limb that can occur after treatment for breast cancer. Incidence of BCRL vary in literature, especially since the introduction of less invasive techniques such as sentinel node procedures and radiotherapy. According to a review of DiSipio et al., the incidence of arm lymphedema was about four times higher in women who had an axillary lymph node dissection (19.9%) than after sentinel lymph node biopsy (5.6%).<sup>4,5</sup> A study by Rockson et al. suggested that in almost 75% of the cases, lymphedema is established within the first year after breast cancer treatment.<sup>6</sup> A volume difference between both limbs of 5 to 10% is normally used to define clinical lymphedema.<sup>4,7</sup>

Lymphedema can progress from a soft pitting edema to a hard fibrotic or soft fatty and non-pitting edema because of lipogenesis, fibrosis, inflammation, lymphangiogenesis and immunosuppression.<sup>8,9</sup>

There is no consensus concerning the best measuring tool to detect the development of BCRL.<sup>10,11</sup>

Volume increase of the limb can be assessed with circumference measurements<sup>12</sup> or with the water displacement method.<sup>13,14</sup> A relative volume change between both arms is used, comparing preoperative measurements between the affected arm and the healthy arm, to the postoperative measurements.<sup>7</sup> In addition, the increase of water content in the edematous limb can be assessed by the pitting test,<sup>15</sup> by measuring the extracellular fluid (bioelectrical impedance spectroscopy)<sup>16</sup> or by measuring the water content of the skin (tissue dielectric constant).<sup>17,18</sup> Measurement of the skinfold thickness (Stemmer sign) can be performed, which is the typical sign for lymphedema.<sup>19</sup>

Historically lymphangiography has been the technique to image the lymphatic system. This technique is difficult to perform and has become obsolete.<sup>20</sup> Lymphoscintigraphy has replaced lymphangiography and became the new standard for imaging the lymphatic system. With lymphoscintigraphy a radionuclide (<sup>99m</sup>Tc-labeled tracer) is injected and followed by sequential gamma imaging.<sup>21,22</sup> This technique not only provides dynamic imaging of the lymphatics and the lymph nodes, but also provides semi-quantitative data of radionuclide transport and lymph node absorption. Near-infrared fluorescence imaging or lymphofluoroscopy is another minimally invasive technique. The injection of indocyanine green (ICG) intradermally allows to visualize lymphatics in the upper 2 cm of the skin using an infrared camera system, capturing the fluorescence.<sup>23,24</sup> It provides real-time relatively high-resolution images and detailed information about the superficial lymphatic transport.<sup>27,28</sup> The images themselves are classified in different patterns: a normal linear lymph transport pattern and three

1  
2  
3 dysfunctional dermal backflow (DB) patterns. The first dysfunctional pattern is the splash pattern,  
4 representing a dispersed tracer in tortuous lymphatic channels. The second is the stardust pattern,  
5 which demonstrates spotted fluorescent signals, representing the effusion of lymph fluid into the  
6 interstitium. The last type is the diffuse pattern wherein the tracer is widely distributed without  
7 identifiable spots. In this pattern, besides accumulation in the lymphatic capillaries and lymph  
8 precollectors, lymph stagnates in the interstitium.<sup>25,26</sup> Different studies have demonstrated that  
9 lymphofluoroscopy is a valid imaging technique to evaluate superficial lymphatic transport in patients  
10 with BCRL<sup>27,28</sup> and can be used for early detection of BCRL.<sup>29</sup>

11  
12 To prevent further evolution to fibrous and fatty tissue, early start of BCRL treatment is  
13 recommended.<sup>30,31</sup> Previous studies demonstrated that early detection of BCRL with clinical  
14 measurement tools such as bioelectrical impedance spectroscopy and volume measurements and  
15 subsequently early start of manual lymph drainage and exercise, reduces the rate of clinical  
16 lymphedema.<sup>32,33</sup> Encouraging participation in regular exercise and maintaining healthy body weight  
17 as well as giving information such as avoiding infection, heat and tight clothing are guidelines to  
18 prevent lymphedema.<sup>3</sup> The additional effect of a compression stocking, in combination with exercise  
19 and information, has never been investigated in patients with early disturbance of lymphatic transport  
20 visualized with lymphofluoroscopy.

21  
22 Therefore, the aim of this study is to investigate the additional effect of wearing a compression  
23 garment on top of the usual care (i.e. exercise and information), on the incidence of clinical  
24 lymphedema and/or deterioration of the dermal backflow visualized by lymphofluoroscopy, in  
25 patients developing early disturbance after treatment for breast cancer.

## 26 27 28 29 30 31 32 33 34 35 36 37 38 39 40 **METHODOLOGY**

### 41 42 43 ***Trial design***

44  
45 This study is a prospective randomised controlled trial. Figure 1 gives an overview of the participant  
46 flow in the trial. All participants are assessed at the Department of Vascular Surgery of the University  
47 Hospitals Leuven.

48  
49 The trial has been approved by the Ethical Committee of the University Hospitals Leuven (CME  
50 reference S60382, EudraCT Number 2017-002306-12). The study has been registered in  
51 clinicaltrials.gov (NCT 03210311).



### ***Patient and public involvement***

The protocol was discussed extensively with the oncologists of the Multidisciplinary Breast Clinic. Patients with BCRL were involved in the trial design and the methods of assessing the lymphedema. They were informed through information sessions at the center for lymphedema. The results of the study will be communicated in a symposium organized for patients recruited in the study and the patients whom were involved in the trial design.

### ***Participants***

All patients scheduled for breast surgery combined with either unilateral axillary lymph node dissection (ALND) or sentinel node biopsy (SNB) in the Multidisciplinary Breast Clinic Center at the University Hospitals Leuven are screened for participation in the study.

Recruitment started in November 2017. Inclusion criteria were 1) Age  $\geq 18$ y, 2) women/men with breast cancer and scheduled for unilateral ALND or SNB, 3) oral and written approval of informed consent, 4) understanding Dutch. Exclusion criteria were 1) age  $< 18$ y, 2) edema of the upper limb from other causes, 3) cannot participate during the entire study period, 4) mentally or physically unable to participate in the study, 5) contra-indication for the use of ICG: allergy to ICG, iodine, hyperthyroidism, 6) metastatic disease.

All patients receives written as well as oral information. All included patients sign an informed consent document prior to the start of the study.

### ***Assessments***

Figure 1 gives an overview of the different assessments and their timing in the trial. All assessments are performed at baseline and at 1, 3, 6, 9, 12, 18, 24 and 36 months postoperatively.

#### ***Near-infrared fluorescence imaging of the lymphatic system or lymphofluoroscopy***

All lymphofluoroscopic assessments are performed by one person (ST) who is blinded to the participant's data as well as to the assigned group if relevant.

1  
2  
3 During lymphofluoroscopy, ICG is injected intradermally in the first and fourth webspace of the hand  
4 on the affected side. An infrared camera system (PDE, Hamamatsu®) captures the fluorescence. The  
5 procedure consists of three consecutive phases (table 1): an early phase, a break and a late phase. All  
6 information about the lymphatic transport is documented in a standard evaluation document and in  
7 case of disturbance, this information is drawn on a body diagram according to the legend (Figure 2).  
8  
9  
10  
11  
12

### 13 *Clinical assessments*

14  
15  
16 The clinical assessments are performed by one assessor. In order to ensure blinding of the assessor,  
17 participants are asked not to share any information concerning their treatment (e.g. wearing  
18 compression garment or not) neither to wear their compression material during evaluations. In  
19 addition, the assessor is blinded to previous measurement data in order to avoid being influenced by  
20 previous results.  
21  
22  
23  
24

25 Table 2 and 3 provides a detailed overview of the clinical evaluation methods and procedures  
26 performed.  
27  
28  
29

### 30 ***Randomization and allocation sequence generation***

31  
32  
33 After visualization of an early disturbance of the lymphatic transport, without the presence of clinical  
34 lymphedema, patients are randomized in either the control group or the preventive treatment group.  
35 Randomization is performed according to 'www.randomization.com'. This generator randomizes each  
36 subject to a single treatment by using the method of randomly permuted blocks. Assessments are  
37 performed by a person blinded to the treatment allocation groups.  
38  
39  
40  
41  
42  
43  
44

### 45 ***Interventions***

46  
47  
48 During hospitalization all participants receive information about the prevention of lymphedema. They  
49 are advised to avoid lifting heavy objects, but to use the affected arm as normally as possible. Limb  
50 constriction and extremes of temperatures should be avoided. In case of heaviness the arm should be  
51 elevated. Skin care is recommended, and gain in body weight should be avoided to prevent  
52 lymphedema. Patients receive a brochure which outlines these guidelines.  
53  
54  
55

56 Participants are prescribed exercise therapy, which is started during hospitalization with low level  
57 mobilizing exercises for the hand, elbow and shoulder. After hospitalization, these exercises are  
58 continued. Patients who underwent ALND are going to a physical therapist nearby to continue physical  
59  
60

1  
2  
3 therapy such as passive mobilization of the shoulder, stretching and transverse strain of the breast  
4 muscles, scar tissue massage and active mobilizing and stabilizing exercises. This starts twice a week  
5 and frequency is gradually diminished. Exercises are continued until a full range of motion is reached.  
6  
7 When a seroma is present intensity of exercises is diminished. Patients who underwent SNB are not  
8 routinely seen by a physical therapist after discharge. If functional shoulder problems are seen at  
9 discharge or at follow-up consultation, physical therapy is prescribed. Patients are encouraged to do  
10 exercises at home twice a day until full range of motion is reached.  
11  
12

13  
14 If early disturbance is seen on lymphofluoroscopy at a control visit, the patient is randomized in either  
15 the preventive treatment group or the control group. In the control group, the usual care is continued  
16 consisting of preventive measures and exercises as described above. The participants in the preventive  
17 treatment group receive the usual care and a compression garment whether or not combined with a  
18 glove on top. The compression garment is measured by an experienced compression specialist. The  
19 first choice is a round knitted custom-made compression garment, compression class 2 (23 -32 mmHg),  
20 Juzo®. If patients are not comfortable with this garment, a flat-knitted garment (Juzo®) is ordered. If  
21 the hand shows swelling after wearing the garment, a glove is measured. Patients need to wear the  
22 garment/glove at daytime during the remaining follow-up time of the trial. Written instructions for  
23 washing and maintenance of the garment and glove are given. Patients receive a new garment/glove  
24 every 6 months. A compression questionnaire is filled in at every visit to assess adherence and adverse  
25 events of the compression material.  
26  
27

28  
29 If clinical lymphedema is established the patient receives the normal standard of care treatment for  
30 lymphedema with decongestive lymphatic therapy. Patients are referred to a specialized physical  
31 therapist or to the UZ Leuven center for lymphedema.  
32  
33  
34

### 35 **Primary outcomes**

36  
37 The primary outcomes are the incidence of clinical lymphedema of the arm/hand measured by  
38 circumference measurements and volume displacement defined as 5% volume increase compared to  
39 the contralateral side (first primary outcome) and the proportion of subjects with deterioration of the  
40 dermal backflow measured by lymphofluoroscopy (second primary outcome) (see table 2).  
41  
42  
43

### 44 **Secondary outcome**

45  
46 Secondary outcome measures are: the incidence of clinical lymphedema of the arm/hand based on  
47 the extracellular fluid content, based on the water content, based on thickening of the skinfold, the  
48  
49  
50  
51  
52  
53  
54  
55  
56  
57  
58  
59  
60

1  
2  
3 relative change of arm volume, the change in functional problems related to the lymphedema and the  
4 change in health-related quality of life (see table 3).  
5  
6  
7

### 8 ***Sample size calculation***

9

10  
11 For both hypotheses a sample size calculation is performed.

12  
13 For the hypothesis that the incidence rate of clinical lymphedema will be lower in the preventive  
14 treatment group than in the control group, we estimate that 50% of the patients in the control group  
15 will develop clinical lymphedema in the first year after the randomization compared to 5% in the  
16 preventive treatment group (wearing a compression garment). The 5% is based on previous studies.<sup>30-</sup>  
17  
18 <sup>32</sup> A study of Stout<sup>30</sup> treated patients, diagnosed with subclinical lymphedema, defined as a volume  
19 difference between both limbs of  $\geq 3\%$ , with a compression garment. The incidence of lymphedema  
20 (stage I/II) at 5 year was 5.6%. Another trial showed that the same type of treatment reduced the  
21 incidence of lymphedema to 4.4%.<sup>31</sup> The 50% incidence of clinical lymphedema in the control group is  
22 based on expert opinion.  
23  
24  
25  
26  
27

28 The sample size calculation is based on the formula in Diggle for a longitudinal study for showing a  
29 time-averaged treatment effect for a binary outcome. Four time points per patient are foreseen (12m,  
30 18m, 24m, 36m). Conservatively a high correlation of 0.90 between repeated measurements is  
31 assumed (higher correlation means larger sample size). Based on a power of 80% and 2.5% significance  
32 level (with a Bonferroni correction for multiple testing given that we test two outcomes, and keeping  
33 a family-wise alpha of 5%), we need a sample size of 14 patients per group. Taking into account a drop-  
34 out rate of 10%, 16 patient per group or a total of 32 randomized patients are needed.  
35  
36  
37  
38  
39  
40

41 For the hypothesis that patients in the preventive treatment group will have less deterioration of  
42 dermal backflow visualized by lymphofluoroscopy, we estimate that a deterioration of the dermal  
43 backflow can be expected in 40% of the cases in the preventive treatment group in contrast to 90% in  
44 the control group. There is one publication studying early detection with lymphofluoroscopy and the  
45 changes of the dermal backflow pattern in case of early treatment. Therapy consists of exercise, skin  
46 care, elevation and the use of a compression garment. This trial shows that only three out of 35  
47 patients with dermal backflow deteriorate during the follow-up.<sup>29</sup> Deterioration was described as a  
48 change in severity of the dermal backflow pattern. In our study also the area of dermal backflow is  
49 taken into account, therefore we estimate a higher rate of deterioration. The 90% deterioration in the  
50 control group is based on expert opinion. The analysis is performed on a binary response (worsening  
51 versus stable condition/ improvement). Sample size calculation is completely analogous to the first  
52 outcome, leading to a total sample size of 30 patients after taking into account 10% of drop-out.  
53  
54  
55  
56  
57  
58  
59  
60

1  
2  
3  
4  
5 To calculate the total amount of patients to be included in the present trial two prospective  
6 observational studies about the incidence of subclinical lymphedema were considered<sup>30-32</sup> and one  
7 study about lymphofluoroscopic observations.<sup>29</sup> In the study by Akita, 196 patients are included in a 1-  
8 year follow-up study with lymphofluoroscopy. Twenty-five percent of the patients developed a dermal  
9 backflow pattern on lymphofluoroscopy.<sup>29</sup> The largest of both sample sizes, i.e. 32 patients, is adopted.  
10 We estimate that in 25% of the patients an early disturbance will be seen, hence 128 patients are  
11 included in the trial.  
12  
13  
14  
15  
16  
17

### 18 ***Statistical methods***

19  
20  
21 Logistic regression analysis will be used for both primary endpoints, studying the difference between  
22 the preventive treatment and control group over the follow-up period. Generalized estimating  
23 equations (GEE) are used to account for repeated measurement. Model covariates include time and  
24 treatment group. The main effect of the preventive treatment group is estimated and presented by  
25 odds ratios with 95% confidence intervals. Both analyses are tested at the 2.5% significance level.  
26  
27  
28  
29

30 All data is analyzed according the intention to treat principle.

31 A 5% level of significance is applied for all secondary analyses.  
32  
33  
34

### 35 ***Monitoring***

36  
37  
38 There are no indications for setting up a data monitoring committee.

39 No adverse events (AE) are expected. AE will be reported during the entire trial period, i.e. 36 months.

40 It will be specified that the investigator(s) and the institution(s) will permit trial-related monitoring,  
41 audits, EC review, and regulatory inspections (where appropriate) by providing direct access to  
42 source data and other documents (i.e. patients' case files).  
43  
44  
45  
46  
47  
48

### 49 **DISCUSSION**

50  
51  
52 This is the first randomized controlled clinical trial investigating the additional effect of wearing a  
53 compression garment, to the usual care (i.e. information and exercises), on the incidence of clinical  
54 lymphedema and/or deterioration of the dermal backflow visualized by near infrared fluorescence  
55 imaging, in patients with early disturbance of the lymphatic transport (i.e. dermal backflow) after  
56  
57  
58  
59  
60

1  
2  
3 treatment for breast cancer. If treatment can start in this early phase of disturbance, further evolution  
4 to clinical lymphedema can perhaps be prevented.  
5  
6  
7

## 8 **ETHICS AND DISSEMINATION**

9  
10 The trial is conducted in compliance with the principles of the Declaration of Helsinki (2008), the  
11 principles of GCP and in accordance with all applicable regulatory requirements. This protocol and  
12 related documents has been approved by the Ethical Committee of the University Hospitals Leuven  
13 (CME reference S60382, EudraCT Number 2017-002306-12). The study has been registered in  
14 clinicaltrials.gov (NCT 03210311).  
15  
16  
17  
18

19  
20 The study can and will be conducted only on the basis of prior informed consent by the participants,  
21 or their legal representatives, to participate in the study. The investigator will obtain a signed informed  
22 consent form (ICF) for all patients prior to their enrollment and participation in the study in compliance  
23 with all applicable laws, regulations and the approval of the Ethics Committee. The investigator will  
24 retain such ICFs in accordance with the requirements of all applicable regulatory agencies and laws.  
25  
26  
27

28 The investigator will treat all information and data relating to the study disclosed as confidential and  
29 shall not disclose such information to any third parties or use such information for any purpose other  
30 than the performance of the study. The collection, processing and disclosure of personal data, such as  
31 patient health and medical information is subject to compliance with applicable personal data  
32 protection and the processing of personal data (Directive 95/46/EC and Belgian law of December 8,  
33 1992 on the Protection of the Privacy in relation to the Processing of Personal Data).  
34  
35  
36  
37

38 Data are anonymous if no one, not even the researcher, can connect the data to the individual who  
39 provided it. No identifying information is collected from the individual.  
40

41 When data are coded, there continues to be a link between the data and the individual who provided  
42 it. The research team is obligated to protect the data from disclosure outside the research according  
43 to the terms of the research protocol and the informed consent document. The subject's name or  
44 other identifiers is stored separately (site file) from the research data and replaced with a unique code  
45 to create a new identity for the subject. The data are stored on a shared file. Only the principle  
46 investigator, sub-investigators and project co-workers (after permission from the principle  
47 investigator) have access to the patient file.  
48  
49  
50  
51  
52  
53  
54

55 The authors declare that they have no known competing financial interests or personal relationships  
56 that could have appeared to influence the work reported in this paper.  
57  
58  
59  
60

1  
2  
3 The results of the study will be send for publication to a peer-review journal. Participants and  
4 healthcare providers will be invited for a symposium to communicate the trial results.  
5  
6  
7

#### 8 **ACKNOWLEDGMENTS**

9

10  
11 The authors are very grateful to the Multidisciplinary Breast Clinic for collaborating in this study. The  
12 authors also extend very grateful thanks to the study participants and the patients who were involved  
13 in the design of the study.  
14  
15  
16  
17

#### 18 **CONTRIBUTERSHIP STATEMENT**

19

20 All authors state that they contributed substantially to the design of the trial, revised it critically, gave  
21 their final approval of the version to be published and agreed to be accountable for all aspects of the  
22 work in ensuring that questions related to the accuracy or integrity of any part of the work are  
23 appropriately investigated and resolved.  
24  
25  
26  
27

#### 28 **COMPETING INTERESTS**

29

30 The authors declare that they have no known competing financial interests or personal relationships  
31 that could have appeared to influence the work reported in this paper.  
32  
33  
34

#### 35 **FUNDING STATEMENT**

36

37 The Dearly trial is financed by the Clinical Research Fund of the University Hospitals Leuven  
38  
39  
40  
41

#### 42 **REFERENCES**

43

- 44 1. The diagnosis and treatment of peripheral lymphedema: 2013 Consensus Document of the  
45 International Society of Lymphology. *Lymphology*. 2013;46:1-11.
- 46 2. Morgan PA, Franks PJ, Moffatt CJ. Health-related quality of life with lymphedema: a review of  
47 the literature. *Int Wound J*. 2005;2:47-62.
- 48 3. Saito Y, Nakagami H, Kaneda Y, Morishita R. Lymphedema and therapeutic  
49 lymphangiogenesis. *Biomed Res Int*. 2013.
- 50 4. DiSipio T, Rye S, Newman B, Hayes S. Incidence of unilateral arm lymphedema after breast  
51 cancer: a systematic review and meta-analysis. *Lancet Oncol*. 2013 May;14(6):500-515.
- 52 5. Gebruers N, Verbelen H, De Vrieze T, Coeck D, Tjalma W. Incidence and time path of  
53 lymphedema in sentinel node negative breast cancer patients: a systematic review. *Arch*  
54 *Phys Med Rehabil*. 2015;96(6):1131-1139.
- 55 6. Rockson SG. Precipitating factors in lymphedema: myths and realities. *Cancer* 1998;83:2814-  
56 2816.  
57  
58  
59  
60

- 1
  - 2
  - 3
  - 4
  - 5
  - 6
  - 7
  - 8
  - 9
  - 10
  - 11
  - 12
  - 13
  - 14
  - 15
  - 16
  - 17
  - 18
  - 19
  - 20
  - 21
  - 22
  - 23
  - 24
  - 25
  - 26
  - 27
  - 28
  - 29
  - 30
  - 31
  - 32
  - 33
  - 34
  - 35
  - 36
  - 37
  - 38
  - 39
  - 40
  - 41
  - 42
  - 43
  - 44
  - 45
  - 46
  - 47
  - 48
  - 49
  - 50
  - 51
  - 52
  - 53
  - 54
  - 55
  - 56
  - 57
  - 58
  - 59
  - 60
7. Sun F, Skolny M, Swaroop M, Rawal B, Catalano P, Brunelle C et al. The need for preoperative baseline arm measurement to accurately quantify breast cancer-related lymphedema. *Breast Cancer Re Treat* 2016;157: 229-240
  8. Carlson JA. Lymphedema and subclinical lymphostasis (microlymphedema) facilitate cutaneous infection, inflammatory dermatoses, and neoplasia: A locus minoris resistentiae *Clin Dermatol*. 2014 Sep-Oct;32(5):599-615.
  9. Michelini S, Campisi C, Gasbarro V, Allegra C, Conte M, Cestari M, Molisso A, Cavezzi A, Mattassi R, Aiello A, Ricci M, Zanetti L. National guidelines on lymphedema. *Lymphology* 2007;55:238-242.
  10. International Society of Lymphology. The diagnosis and treatment of peripheral lymphedema: 2013 Consensus Document of the international society of lymphology. *Lymphology* 2013; 46: 1-11.
  11. De Vrieze T, Gebruers N, Tjalma WA, Nevelsteen I, Thomis S, De Groef A et al. What is the best method to determine excessive arm volume in patients with breast cancer-related lymphedema in clinical practice? Reliability, time efficiency and clinical feasibility of five different methods. *Clin Rehabil*. 2019 Jul;33(7):1221-1232.
  12. Devoogdt N, Lemkens H, Geraerts I, Van Nuland I, Flour M, Coremans T, et al. A new device to measure upper limb circumferences: validity and reliability. *Int Angiol* 2010; 29: 401-407.
  13. Gebruers N, Truijien S, Engelborghs S, De Deyn PP. Volumetric evaluation of upper extremities in 250 healthy persons. *Clin Physiol Funct Imaging* 2007;27(1):17-22.
  14. Damstra RJ, Glazenburg EJ, Hop WC. Validation of the inverse water volumetry method: A new gold standard for arm volume measurements. *Breast Cancer Res Treat* 2006;99(3):267-273.
  15. Sanderson J, Tuttle N, Box R, Reul-Hirche H.M. The pitting test: an investigation of an unstandardized assessment of lymphedema. *Lymphology* 2015; 48: 175-183.
  16. Cornish B. Bioimpedance Analysis: Scientific Background. *Lymphat Res Biol*. 2006; 4: 47-50.
  17. Mayrovitz HN, Weingrad DN, Davey S. Local tissue water in at-risk and contralateral forearms of women with and without Breast. *Lymphat Res Biol*. 2009; 7: 153-158.
  18. Mayrovitz HN, Weingrad DN, Lopez L. Tissue dielectric constant (TDC) as an index of skin water in women with and without breast cancer: upper limb assessment via a self-contained compact measurement device. *Lymphology*. 2016; 49: 27-35.
  19. Brorson H. Liposuction in arm lymphedema treatment. *Scand J Surg* 2003; 92: 287-295.
  20. Kinmonth JB, Taylor GW, Tracy GD, Marsh JD. Primary lymphedema: clinical and lymphangiographic studies in a series of 107 patients in which the lower limbs were affected. *Br J Surg*. 1957;45:1-10.
  21. Henze E, Schelbert HR, Collins JD, Najafi A, Barrio JR, Bennett LR. Lymphoscintigraphy with Tc-99m-Labeled Dextran. *J Nucl Med* 1982; 23:923-929.
  22. Szuba A, Shin W, Strauss W, Rockson S. The Third circulation: Radionuclide Lymphoscintigraphy in the evaluation of lymphedema. *J Nucl Med* 2003;44:43-57.
  23. Rasmussen J, Tan I, Marshall M, Adams K, Kwon S, Fife C, Maus E, Smith L, Covington K, Sevick-Muraca E. Human lymphatic architecture and dynamic transport imaged using Near-infrared Fluorescence. *Transl oncology* 2010;3:362-372.
  24. Tan I, Maus E, Rasmussen J, Marshall M, Adams K, Hife C, Smith L, Chan W, Sevick-Muraca E. Assessment of Lymphatic Contractile Function after manual lymphatic drainage using near-infrared fluorescence imaging. *Arch Phys Med Rehabil* 2011; 92:756-764.
  25. Unno N, Inuzuka K, Suzuki M, Yamamoto N, Sagara D, Nishiyama M, Konno H. Preliminary experience with a novel fluorescence lymphography using indocyanine green in patients with secondary lymphedema. *J Vasc Surg* 2007;45:1016-1021.
  26. Yamamoto T, Yamamoto N, Doi K, Oshima A, Yoshimatsu H, Todokoro T, et al. Indocyanine green-enhanced lymphography for upper extremity lymphedema: a novel severity staging system using dermal backflow patterns. *Plast Reconstr Surg*. 2011; 128: 941-947.



- 1
  - 2
  - 3
  - 4
  - 5
  - 6
  - 7
  - 8
  - 9
  - 10
  - 11
  - 12
  - 13
  - 14
  - 15
  - 16
  - 17
  - 18
  - 19
  - 20
  - 21
  - 22
  - 23
  - 24
  - 25
  - 26
  - 27
  - 28
  - 29
  - 30
  - 31
  - 32
  - 33
  - 34
  - 35
  - 36
  - 37
  - 38
  - 39
  - 40
  - 41
  - 42
  - 43
  - 44
  - 45
  - 46
  - 47
  - 48
  - 49
  - 50
  - 51
  - 52
  - 53
  - 54
  - 55
  - 56
  - 57
  - 58
  - 59
  - 60
27. Mihara M, Hara H, Araki J, Kikuchi K, Narushima M, Yamamoto T, Lida T. Indocyanine Green Lymphography is superior to lymphoscintigraphy for diagnostic imaging of early lymphedema of the upper limbs. *PLoS One* 2012 June;7(6): 1-9.
28. Akita S, Mitsukawa N, Kazama T, Kuriyama M, Kubota Y, Omori N, Koizumi T, Kosoka K, Uno T, Satoh K. Comparison of lymphoscintigraphy and indocyanine green lymphography for the diagnosis of extremity lymphedema. *J of Plast, reconst en Asth Surg* 2013: 2013 Jun;66(6):792-798.
29. Akita S, Nakamura R, Yamamoto N, Tokumoto H et al. Early detection of lymphatic disorder and treatment for lymphedema following breast cancer. *Plast Reconstr Surg* 2016;138:192-202.
30. Stout N, Pfalzer L, McGarvey C, Springer B, Gerber L, Soballe P. Preoperative assessment enables the early diagnosis and successful treatment of lymphedema. *Cancer* 2008;112:2809-2819.
31. Soran A, Ozmen T, McGuire K, Diego E et al. The importance of detection of subclinical lymphedema for the prevention of breast cancer-related clinical lymphedema after axillary lymph node dissection; a prospective observational study. *Lymph Res Biol* 2014;12(4): 289-294.
32. Shah C, Arthur D, Wazer D, Khan A, Ridner S, Vicini F. The impact of early detection and intervention of breast cancer-related lymphedema: a systematic review. *Cancer Medicine* 2016;5(6):1154-1162.
33. Gençay Can A, Ekşioğlu E, Çakçı FA. Early Detection and Treatment of Subclinical Lymphedema in Patients with Breast Cancer. *Lymphat Res Biol*. 2018 Dec 13.
34. Hayes S, Johanssen K, Stout N, Prosnitz R, Armer J, Gabram S et al. Upper-body morbidity after breast cancer: Incidence and evidence for evaluation, prevention, and management within a prospective surveillance of care. *Cancer* 2012;118:2237-2249.
35. Devoogdt N, Van Kampen M, Geraerts I, Coremans T, Christiaens MR. The Lymphoedema Functioning, Disability and Health (Lymph-ICF) questionnaire: reliability and validity. *Phys Ther*. 2011;91:944-957.
36. De Vrieze T, Coeck D, Verbelen H, Devoogdt N, Tjalma W, Gebruers N. Cross-cultural Psychometric Evaluation of the Dutch McGill-QoL Questionnaire for Breast Cancer Patients. *Facts Views Vis Ob gyn*. 2016;8(4):205-209

1  
2  
3 **List of Figures**  
4

5 Figure 1. Flow of participants in the trial  
6

7 Figure 2. Example of body diagram  
8

9  
10 Figure 3. Description of the reference points needed for the local clinical assessments  
11  
12  
13  
14  
15  
16  
17  
18

19 **List of Tables**  
20

21 Table 1. Protocol near-infrared fluorescence imaging  
22

23 Table 2. Overview of measurement method and calculation of the primary outcomes  
24

25 Table 3. Overview of measurement method and calculation of the secondary outcome  
26  
27  
28  
29  
30  
31  
32  
33  
34  
35  
36  
37  
38  
39  
40  
41  
42  
43  
44  
45  
46  
47  
48  
49  
50  
51  
52  
53  
54  
55  
56  
57  
58  
59  
60

Table 1. Protocol near-infrared fluorescence imaging

| Step        |                                    | description                                                                                                                                                                                                                                                                                                                                                                                                                                                                     | reporting                                                                                                                                                                                                                                                                                                                                                                                                                                                                                                 |
|-------------|------------------------------------|---------------------------------------------------------------------------------------------------------------------------------------------------------------------------------------------------------------------------------------------------------------------------------------------------------------------------------------------------------------------------------------------------------------------------------------------------------------------------------|-----------------------------------------------------------------------------------------------------------------------------------------------------------------------------------------------------------------------------------------------------------------------------------------------------------------------------------------------------------------------------------------------------------------------------------------------------------------------------------------------------------|
| Preparation | 0.1 Dilution of ICG                | Suspended ICG in 25 ml pure water and subsequently diluted with saline water to reach a final concentration of 0.20 mg/ml                                                                                                                                                                                                                                                                                                                                                       |                                                                                                                                                                                                                                                                                                                                                                                                                                                                                                           |
|             | 0.2 Camera                         | Camera is held perpendicular to the observed skin at distance of 15 cm (best focus)                                                                                                                                                                                                                                                                                                                                                                                             |                                                                                                                                                                                                                                                                                                                                                                                                                                                                                                           |
|             | 0.3 Injection of ICG               | Intradermal injection in 1 <sup>st</sup> (ulnar injection point) and 4 <sup>th</sup> web space (radial injection point) dorsally in the hand<br>0.2 ml of the diluted solution is injected in each injection point                                                                                                                                                                                                                                                              | Time of injection                                                                                                                                                                                                                                                                                                                                                                                                                                                                                         |
| Early phase | 1.1 Rest: 1 min                    | Hand in resting position on table                                                                                                                                                                                                                                                                                                                                                                                                                                               | Linear transport starting from ulnar injection point: Yes / No (if "yes", after ..... sec)<br>Linear transport starting from radial injection point: Yes / No (if "yes", after ..... sec)                                                                                                                                                                                                                                                                                                                 |
|             | 1.2 Stimulation: 3 min             | Lymph capillaries at the level of the injection points are filled and transport through the lymph collectors is stimulated by the assessor                                                                                                                                                                                                                                                                                                                                      |                                                                                                                                                                                                                                                                                                                                                                                                                                                                                                           |
|             | 1.3 Scan with camera and measuring | 1) of the arm and shoulder with hand in pronation: starting at hand up to the retroclavicular region,<br>2) of the arm and axilla with hand in supination and abduction of the shoulder: starting at hand up to the axilla, together with the pectoral region: from the ipsilateral to the contralateral axilla,<br>3) of the scapular region: from the ipsilateral to the contralateral axilla,<br>4) of the pectoral region: from the ipsilateral to the contralateral axilla | After scan, reporting on an assessment form:<br><ul style="list-style-type: none"> <li>- Number of lymph collectors</li> <li>- Of each lymph collector: length (measured with tapeline in cm), location and normal versus dilated situation</li> <li>- Presence of splash, stardust and diffuse pattern and location (fingers, hand, proximal/ distal and ventral/ dorsal lower or upper arm, breast and trunk)</li> <li>- Number of lymph nodes (cubital, humeral, axillary, retroclavicular)</li> </ul> |

|            |                                      |                                                                                                                                          |                                               |
|------------|--------------------------------------|------------------------------------------------------------------------------------------------------------------------------------------|-----------------------------------------------|
| Break      | 30 min                               |                                                                                                                                          |                                               |
| Late phase | 3.1 Scan with camera and measuring   | See step 1.3                                                                                                                             | See step 1.3                                  |
|            | 3.2 Drawing on skin and body diagram | If disturbance is seen lymph collectors and dermal backflow (splash, stardust and diffuse) are designed on a body diagram (see figure 2) | Design on body diagram if disturbance is seen |

For peer review only

Table 2. Overview of measurement method and calculation of the primary outcomes

| Outcome parameter                                                                                                                                          | Measurement time, method, material                                                                                                                                                                                                                                                                                         | Calculation                                                                                                                                                                                                                                                                                                                                                                                                                                                                                                                                             |
|------------------------------------------------------------------------------------------------------------------------------------------------------------|----------------------------------------------------------------------------------------------------------------------------------------------------------------------------------------------------------------------------------------------------------------------------------------------------------------------------|---------------------------------------------------------------------------------------------------------------------------------------------------------------------------------------------------------------------------------------------------------------------------------------------------------------------------------------------------------------------------------------------------------------------------------------------------------------------------------------------------------------------------------------------------------|
| <p><i>Cumulative incidence of clinical lymphedema defined as:</i></p> <p>≥5% increase of relative arm volume difference compared to pre-surgical value</p> | <p>Before surgery, at 12M, 18M, 24M and 36M.</p> <p>With perimeter</p> <p>Circumferences at olecranon and 4, 8, 12, 16 and 20cm above and under olecranon of arm at affected and healthy side<sup>12</sup></p> <p>With volumeter, weighing balance and recipient</p> <p>Water displacement method hand<sup>13,14</sup></p> | <p>0 = No clinical lymphedema</p> <p>1 = Clinical lymphedema</p> <p>Relative arm volume difference compared to pre-surgical value = relative arm volume difference at assessment – relative arm volume difference at baseline</p> <p>Relative arm volume difference = (absolute arm volume difference/ arm volume healthy side) x 100</p> <p>Absolute arm volume difference = arm volume affected side – arm volume healthy side</p> <p>Arm volume = sum of volume of different arm segments determined by circumference measurements + hand volume</p> |

1  
2  
3  
4  
5  
6  
7  
8  
9  
10  
11  
12  
13  
14  
15  
16  
17  
18  
19  
20  
21  
22  
23  
24  
25  
26  
27  
28  
29  
30  
31  
32  
33  
34  
35  
36  
37  
38  
39  
40  
41  
42  
43  
44  
45  
46  
47  
48  
49  
50  
51  
52  
53  
54  
55  
56  
57  
58  
59  
60

|                                                                                |                                                                                                                                                  |                                                                                                                                                                                                                                                                                                                                                                           |
|--------------------------------------------------------------------------------|--------------------------------------------------------------------------------------------------------------------------------------------------|---------------------------------------------------------------------------------------------------------------------------------------------------------------------------------------------------------------------------------------------------------------------------------------------------------------------------------------------------------------------------|
|                                                                                |                                                                                                                                                  | <p>Arm segment = <math>4 \times (C_1^2 + C_1C_2 + C_2^2) / 12\pi</math>, where <math>C_1</math> is the upper circumference and <math>C_2</math> is the lower circumference of each segment (formula of the truncated cone)<sup>12</sup></p> <p>Hand volume = volume measured with volumeter</p>                                                                           |
| <p><i>Proportion of subjects with deterioration of the dermal backflow</i></p> | <p>At 12M, 18M, 24M and 36M.</p> <p>With lymphofluoroscopy: injecting ICG in the hand of the affected arm<sup>26</sup>, protocol see table 1</p> | <p>0 = Stabilization or improvement</p> <p>1 = Deterioration</p> <p>Stabilization: stable area of dermal backflow OR stable dermal backflow pattern</p> <p>Improvement: diminished area of dermal backflow OR diminished severity of dermal backflow pattern</p> <p>Deterioration: increased area of dermal backflow OR increased severity of dermal backflow pattern</p> |

Table 3. Overview of measurement method and calculation of the secondary outcomes

| Outcome parameter                                                         | Measurement time, method,<br>material                                                                                                                                                                                                                      | Calculation                                                                                                                                                                                               |
|---------------------------------------------------------------------------|------------------------------------------------------------------------------------------------------------------------------------------------------------------------------------------------------------------------------------------------------------|-----------------------------------------------------------------------------------------------------------------------------------------------------------------------------------------------------------|
| <i>Incidence of lymphedema based on pitting status</i>                    | At 12M, 18M, 24M and 36M.<br>The therapist gives a vertical pressure with the thumb for 5 seconds at the 7 reference points (see figure 3) <sup>15</sup>                                                                                                   | 0 = The skin immediately returns to starting position<br>1 = Pitting is present                                                                                                                           |
| <i>Incidence of lymphedema based on skinfold thickness</i>                | At 12M, 18M, 24M and 36M.<br>The examiner picks up the skinfolds between thumb and index finger at the 7 reference points (see figure 3). <sup>19</sup> The skinfold thickness of the edematous side is compared to the non-edematous side (Stemmer sign). | 0 = No increase in skinfold thickness<br>1 = An increase in skinfold thickness                                                                                                                            |
| <i>Incidence of lymphedema based on the amount of extracellular fluid</i> | Before surgery, at 12M, 18M, 24M and 36M.<br>Impedimed L-dex U400 <sup>16</sup><br>Reference points<br>On each hand, one double electrode is placed on the dorsum of the hand<br>On the right foot, one double                                             | 0= Patients with a score of <10 L-Dex units or with an increase of < 10 units from baseline<br>1 = Patients with a score of >10 L-Dex units or with an increase of ≥ 10 units from baseline <sup>31</sup> |

|                                                                                   |                                                                                                                                                     |                                                                                                                                                                                                                                |
|-----------------------------------------------------------------------------------|-----------------------------------------------------------------------------------------------------------------------------------------------------|--------------------------------------------------------------------------------------------------------------------------------------------------------------------------------------------------------------------------------|
|                                                                                   | electrode is placed on the<br>dorsum of the foot.                                                                                                   |                                                                                                                                                                                                                                |
| <i>Incidence of lymphedema based on the water content</i>                         | At 12M, 18M, 24M and 36M.<br>MoistureMeter D Compact<br>(Delfin Technologies)<br>measured at the 7 reference<br>points (see figure 3) <sup>18</sup> | Ratio PWC =<br>PWC healthy side / PWC affected side<br>0 = ratio PWC < 1.2<br>1 = ratio PWC ≥ 1.2                                                                                                                              |
| <i>Relative change of arm volume difference (in %)</i>                            | Before surgery, at 12M, 18M,<br>24M and 36M.                                                                                                        | Relative arm volume difference = relative<br>volume difference at assessment – relative<br>volume difference at baseline<br>See table 2 for further explanation.                                                               |
| <i>Problems in functioning related to development of lymphedema (score 0-100)</i> | At 12M, 18M, 24M and 36M.<br>Using Lymf-ICF questionnaire <sup>35</sup><br>Filled out by patient                                                    | Total score and physical function score, mental<br>function score, household activities score,<br>mobility activities score and life and social<br>activities score<br>A lower score indicates less problems in<br>functioning |
| <i>Health related quality of life</i>                                             | At 12M, 18M, 24M and 36M.<br>Using Mc Gill questionnaire <sup>36</sup><br>(Dutch version)<br>Filled out by patient                                  | A lower score indicates a lower Quality of Life                                                                                                                                                                                |



Figure 1. Flow of participants

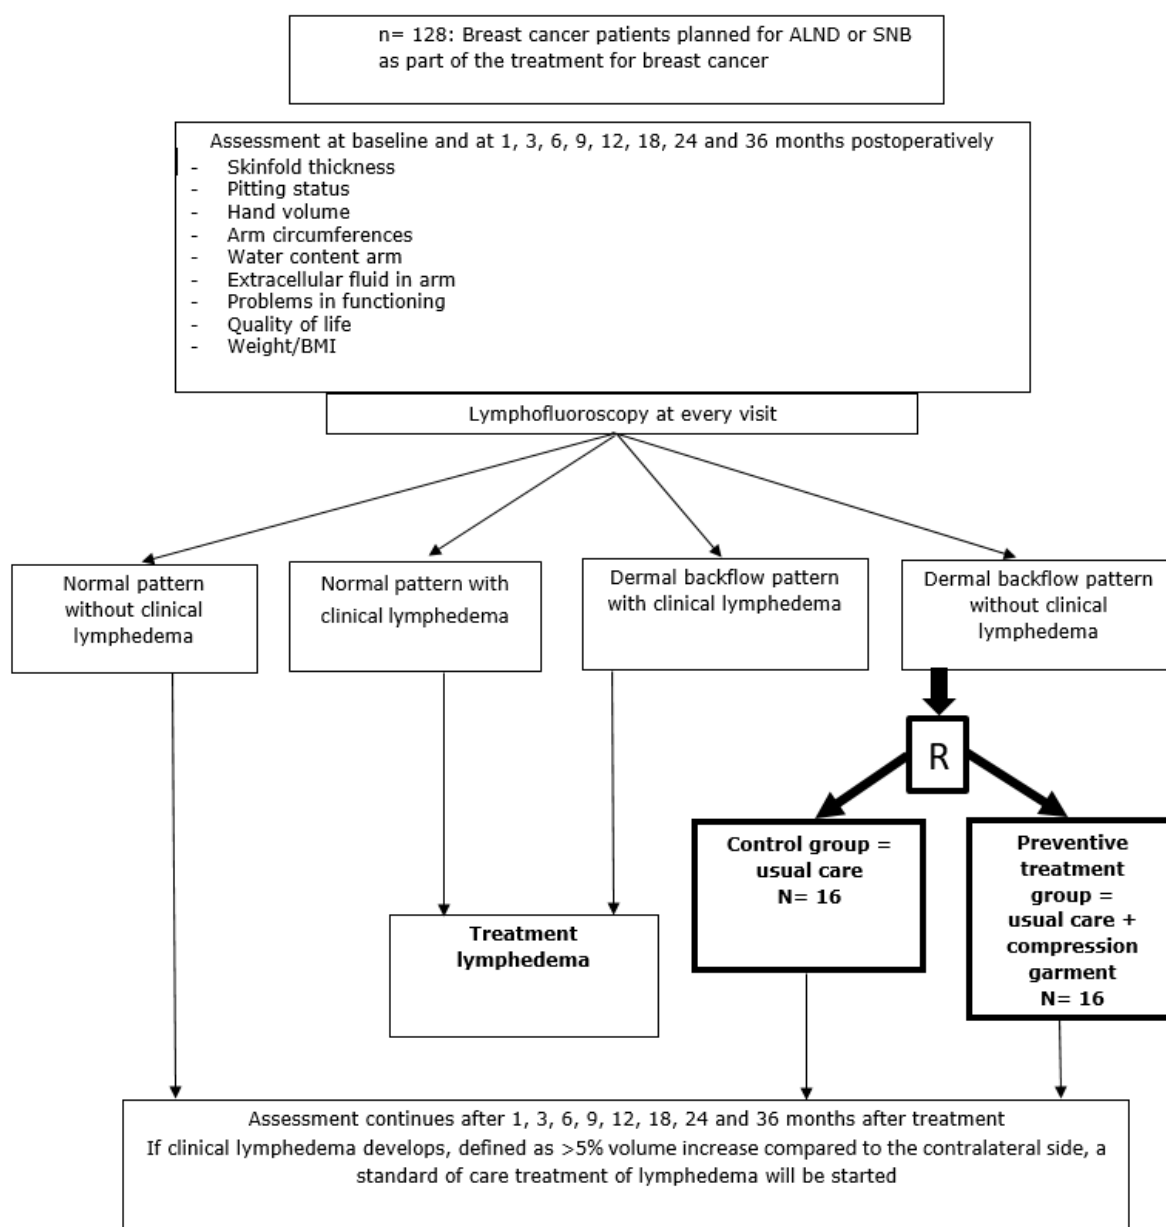

Figure 2. Example of body diagram

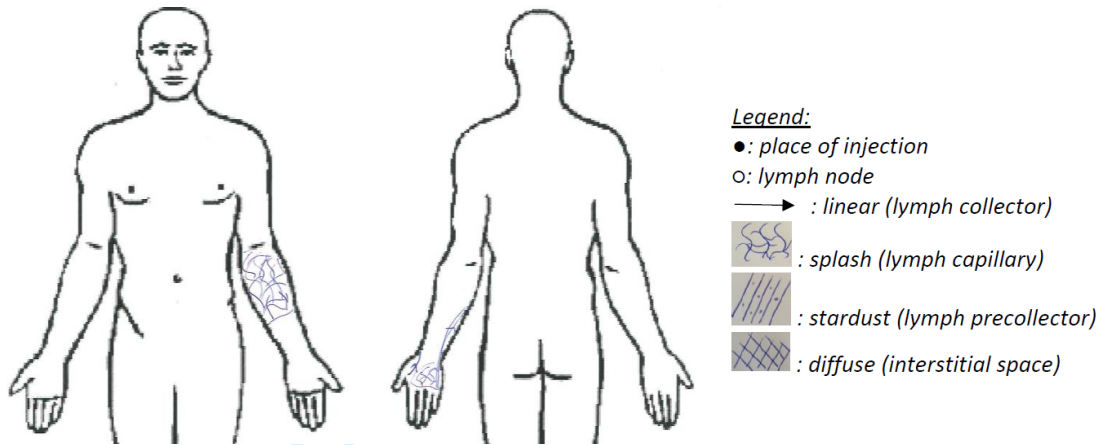

or peer review only

1  
2  
3  
4  
5  
6  
7  
8  
9  
10  
11  
12  
13  
14  
15  
16  
17  
18  
19  
20  
21  
22  
23  
24  
25  
26  
27  
28  
29  
30  
31  
32  
33  
34  
35  
36  
37  
38  
39  
40  
41  
42  
43  
44  
45  
46  
47  
48  
49  
50  
51  
52  
53  
54  
55  
56  
57  
58  
59  
60

Figure 3: Description of the reference points needed for the local clinical assessments

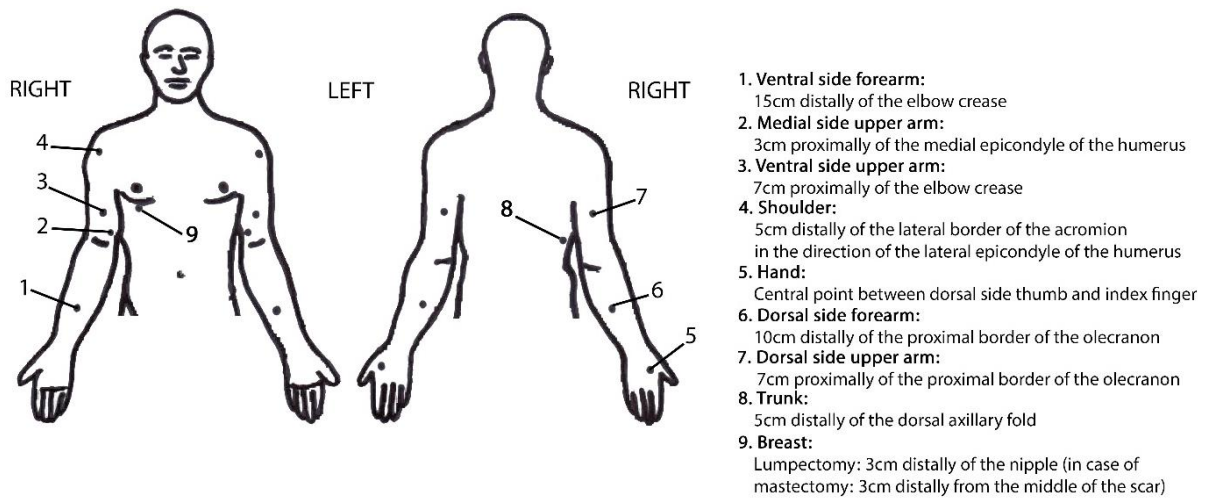

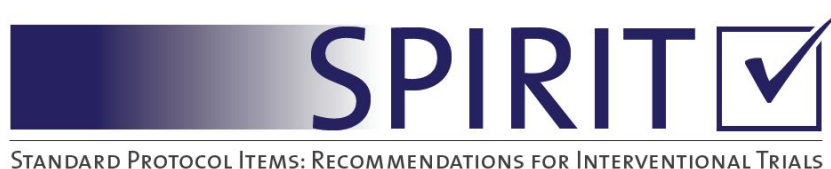

SPIRIT 2013 Checklist: Recommended items to address in a clinical trial protocol and related documents\*

| Section/item                      | Item No | Description                                                                                                                                                                                                                                                                              |
|-----------------------------------|---------|------------------------------------------------------------------------------------------------------------------------------------------------------------------------------------------------------------------------------------------------------------------------------------------|
| <b>Administrative information</b> |         |                                                                                                                                                                                                                                                                                          |
| Title                             | 1       | Descriptive title identifying the study design, population, interventions, and, if applicable, trial acronym                                                                                                                                                                             |
| Trial registration                | 2a      | Trial identifier and registry name. If not yet registered, name of intended registry                                                                                                                                                                                                     |
|                                   | 2b      | All items from the World Health Organization Trial Registration Data Set                                                                                                                                                                                                                 |
| Protocol version                  | 3       | Date and version identifier                                                                                                                                                                                                                                                              |
| Funding                           | 4       | Sources and types of financial, material, and other support                                                                                                                                                                                                                              |
| Roles and responsibilities        | 5a      | Names, affiliations, and roles of protocol contributors                                                                                                                                                                                                                                  |
|                                   | 5b      | Name and contact information for the trial sponsor                                                                                                                                                                                                                                       |
|                                   | 5c      | Role of study sponsor and funders, if any, in study design; collection, management, analysis, and interpretation of data; writing of the report; and the decision to submit the report for publication, including whether they will have ultimate authority over any of these activities |
|                                   | 5d      | Composition, roles, and responsibilities of the coordinating centre, steering committee, endpoint adjudication committee, data management team, and other individuals or groups overseeing the trial, if applicable (see Item 21a for data monitoring committee)                         |
| <b>Introduction</b>               |         |                                                                                                                                                                                                                                                                                          |
| Background and rationale          | 6a      | Description of research question and justification for undertaking the trial, including summary of relevant studies (published and unpublished) examining benefits and harms for each intervention                                                                                       |
|                                   | 6b      | Explanation for choice of comparators                                                                                                                                                                                                                                                    |
| Objectives                        | 7       | Specific objectives or hypotheses                                                                                                                                                                                                                                                        |
| Trial design                      | 8       | Description of trial design including type of trial (eg, parallel group, crossover, factorial, single group), allocation ratio, and framework (eg, superiority, equivalence, noninferiority, exploratory)                                                                                |

## Methods: Participants, interventions, and outcomes

|                      |     |                                                                                                                                                                                                                                                                                                                                                                                |
|----------------------|-----|--------------------------------------------------------------------------------------------------------------------------------------------------------------------------------------------------------------------------------------------------------------------------------------------------------------------------------------------------------------------------------|
| Study setting        | 9   | Description of study settings (eg, community clinic, academic hospital) and list of countries where data will be collected. Reference to where list of study sites can be obtained                                                                                                                                                                                             |
| Eligibility criteria | 10  | Inclusion and exclusion criteria for participants. If applicable, eligibility criteria for study centres and individuals who will perform the interventions (eg, surgeons, psychotherapists)                                                                                                                                                                                   |
| Interventions        | 11a | Interventions for each group with sufficient detail to allow replication, including how and when they will be administered                                                                                                                                                                                                                                                     |
|                      | 11b | Criteria for discontinuing or modifying allocated interventions for a given trial participant (eg, drug dose change in response to harms, participant request, or improving/worsening disease)                                                                                                                                                                                 |
|                      | 11c | Strategies to improve adherence to intervention protocols, and any procedures for monitoring adherence (eg, drug tablet return, laboratory tests)                                                                                                                                                                                                                              |
|                      | 11d | Relevant concomitant care and interventions that are permitted or prohibited during the trial                                                                                                                                                                                                                                                                                  |
| Outcomes             | 12  | Primary, secondary, and other outcomes, including the specific measurement variable (eg, systolic blood pressure), analysis metric (eg, change from baseline, final value, time to event), method of aggregation (eg, median, proportion), and time point for each outcome. Explanation of the clinical relevance of chosen efficacy and harm outcomes is strongly recommended |
| Participant timeline | 13  | Time schedule of enrolment, interventions (including any run-ins and washouts), assessments, and visits for participants. A schematic diagram is highly recommended (see Figure)                                                                                                                                                                                               |
| Sample size          | 14  | Estimated number of participants needed to achieve study objectives and how it was determined, including clinical and statistical assumptions supporting any sample size calculations                                                                                                                                                                                          |
| Recruitment          | 15  | Strategies for achieving adequate participant enrolment to reach target sample size                                                                                                                                                                                                                                                                                            |

## Methods: Assignment of interventions (for controlled trials)

### Allocation:

|                     |     |                                                                                                                                                                                                                                                                                                                                                          |
|---------------------|-----|----------------------------------------------------------------------------------------------------------------------------------------------------------------------------------------------------------------------------------------------------------------------------------------------------------------------------------------------------------|
| Sequence generation | 16a | Method of generating the allocation sequence (eg, computer-generated random numbers), and list of any factors for stratification. To reduce predictability of a random sequence, details of any planned restriction (eg, blocking) should be provided in a separate document that is unavailable to those who enrol participants or assign interventions |
|---------------------|-----|----------------------------------------------------------------------------------------------------------------------------------------------------------------------------------------------------------------------------------------------------------------------------------------------------------------------------------------------------------|

|    |                |     |                                                                         |
|----|----------------|-----|-------------------------------------------------------------------------|
| 1  |                |     |                                                                         |
| 2  | Allocation     | 16b | Mechanism of implementing the allocation sequence (eg, central          |
| 3  | concealment    |     | telephone; sequentially numbered, opaque, sealed envelopes),            |
| 4  | mechanism      |     | describing any steps to conceal the sequence until interventions are    |
| 5  |                |     | assigned                                                                |
| 6  |                |     |                                                                         |
| 7  | Implementation | 16c | Who will generate the allocation sequence, who will enrol participants, |
| 8  |                |     | and who will assign participants to interventions                       |
| 9  |                |     |                                                                         |
| 10 | Blinding       | 17a | Who will be blinded after assignment to interventions (eg, trial        |
| 11 | (masking)      |     | participants, care providers, outcome assessors, data analysts), and    |
| 12 |                |     | how                                                                     |
| 13 |                | 17b | If blinded, circumstances under which unblinding is permissible, and    |
| 14 |                |     | procedure for revealing a participant's allocated intervention during   |
| 15 |                |     | the trial                                                               |
| 16 |                |     |                                                                         |
| 17 |                |     |                                                                         |
| 18 |                |     |                                                                         |
| 19 |                |     |                                                                         |

### Methods: Data collection, management, and analysis

|    |                 |     |                                                                          |
|----|-----------------|-----|--------------------------------------------------------------------------|
| 20 |                 |     |                                                                          |
| 21 | Data collection | 18a | Plans for assessment and collection of outcome, baseline, and other      |
| 22 | methods         |     | trial data, including any related processes to promote data quality (eg, |
| 23 |                 |     | duplicate measurements, training of assessors) and a description of      |
| 24 |                 |     | study instruments (eg, questionnaires, laboratory tests) along with      |
| 25 |                 |     | their reliability and validity, if known. Reference to where data        |
| 26 |                 |     | collection forms can be found, if not in the protocol                    |
| 27 |                 | 18b | Plans to promote participant retention and complete follow-up,           |
| 28 |                 |     | including list of any outcome data to be collected for participants who  |
| 29 |                 |     | discontinue or deviate from intervention protocols                       |
| 30 |                 |     |                                                                          |
| 31 | Data            | 19  | Plans for data entry, coding, security, and storage, including any       |
| 32 | management      |     | related processes to promote data quality (eg, double data entry;        |
| 33 |                 |     | range checks for data values). Reference to where details of data        |
| 34 |                 |     | management procedures can be found, if not in the protocol               |
| 35 |                 |     |                                                                          |
| 36 | Statistical     | 20a | Statistical methods for analysing primary and secondary outcomes.        |
| 37 | methods         |     | Reference to where other details of the statistical analysis plan can be |
| 38 |                 |     | found, if not in the protocol                                            |
| 39 |                 | 20b | Methods for any additional analyses (eg, subgroup and adjusted           |
| 40 |                 |     | analyses)                                                                |
| 41 |                 | 20c | Definition of analysis population relating to protocol non-adherence     |
| 42 |                 |     | (eg, as randomised analysis), and any statistical methods to handle      |
| 43 |                 |     | missing data (eg, multiple imputation)                                   |
| 44 |                 |     |                                                                          |
| 45 |                 |     |                                                                          |
| 46 |                 |     |                                                                          |
| 47 |                 |     |                                                                          |
| 48 |                 |     |                                                                          |
| 49 |                 |     |                                                                          |
| 50 |                 |     |                                                                          |
| 51 |                 |     |                                                                          |

### Methods: Monitoring

|    |                 |     |                                                                      |
|----|-----------------|-----|----------------------------------------------------------------------|
| 52 |                 |     |                                                                      |
| 53 | Data monitoring | 21a | Composition of data monitoring committee (DMC); summary of its role  |
| 54 |                 |     | and reporting structure; statement of whether it is independent from |
| 55 |                 |     | the sponsor and competing interests; and reference to where further  |
| 56 |                 |     | details about its charter can be found, if not in the protocol.      |
| 57 |                 |     | Alternatively, an explanation of why a DMC is not needed             |
| 58 |                 |     |                                                                      |
| 59 |                 |     |                                                                      |
| 60 |                 |     |                                                                      |

|    |          |     |                                                                        |
|----|----------|-----|------------------------------------------------------------------------|
| 1  |          |     |                                                                        |
| 2  |          | 21b | Description of any interim analyses and stopping guidelines, including |
| 3  |          |     | who will have access to these interim results and make the final       |
| 4  |          |     | decision to terminate the trial                                        |
| 5  |          |     |                                                                        |
| 6  | Harms    | 22  | Plans for collecting, assessing, reporting, and managing solicited and |
| 7  |          |     | spontaneously reported adverse events and other unintended effects     |
| 8  |          |     | of trial interventions or trial conduct                                |
| 9  |          |     |                                                                        |
| 10 |          |     |                                                                        |
| 11 | Auditing | 23  | Frequency and procedures for auditing trial conduct, if any, and       |
| 12 |          |     | whether the process will be independent from investigators and the     |
| 13 |          |     | sponsor                                                                |
| 14 |          |     |                                                                        |

### **Ethics and dissemination**

|    |                   |     |                                                                               |
|----|-------------------|-----|-------------------------------------------------------------------------------|
| 15 |                   |     |                                                                               |
| 16 |                   |     |                                                                               |
| 17 | Research ethics   | 24  | Plans for seeking research ethics committee/institutional review board        |
| 18 | approval          |     | (REC/IRB) approval                                                            |
| 19 |                   |     |                                                                               |
| 20 |                   |     |                                                                               |
| 21 | Protocol          | 25  | Plans for communicating important protocol modifications (eg,                 |
| 22 | amendments        |     | changes to eligibility criteria, outcomes, analyses) to relevant parties      |
| 23 |                   |     | (eg, investigators, REC/IRBs, trial participants, trial registries, journals, |
| 24 |                   |     | regulators)                                                                   |
| 25 |                   |     |                                                                               |
| 26 | Consent or assent | 26a | Who will obtain informed consent or assent from potential trial               |
| 27 |                   |     | participants or authorised surrogates, and how (see Item 32)                  |
| 28 |                   |     |                                                                               |
| 29 |                   | 26b | Additional consent provisions for collection and use of participant data      |
| 30 |                   |     | and biological specimens in ancillary studies, if applicable                  |
| 31 |                   |     |                                                                               |
| 32 |                   |     |                                                                               |
| 33 | Confidentiality   | 27  | How personal information about potential and enrolled participants will       |
| 34 |                   |     | be collected, shared, and maintained in order to protect confidentiality      |
| 35 |                   |     | before, during, and after the trial                                           |
| 36 |                   |     |                                                                               |
| 37 | Declaration of    | 28  | Financial and other competing interests for principal investigators for       |
| 38 | interests         |     | the overall trial and each study site                                         |
| 39 |                   |     |                                                                               |
| 40 |                   |     |                                                                               |
| 41 | Access to data    | 29  | Statement of who will have access to the final trial dataset, and             |
| 42 |                   |     | disclosure of contractual agreements that limit such access for               |
| 43 |                   |     | investigators                                                                 |
| 44 |                   |     |                                                                               |
| 45 | Ancillary and     | 30  | Provisions, if any, for ancillary and post-trial care, and for                |
| 46 | post-trial care   |     | compensation to those who suffer harm from trial participation                |
| 47 |                   |     |                                                                               |
| 48 | Dissemination     | 31a | Plans for investigators and sponsor to communicate trial results to           |
| 49 | policy            |     | participants, healthcare professionals, the public, and other relevant        |
| 50 |                   |     | groups (eg, via publication, reporting in results databases, or other         |
| 51 |                   |     | data sharing arrangements), including any publication restrictions            |
| 52 |                   |     |                                                                               |
| 53 |                   | 31b | Authorship eligibility guidelines and any intended use of professional        |
| 54 |                   |     | writers                                                                       |
| 55 |                   |     |                                                                               |
| 56 |                   |     |                                                                               |
| 57 |                   | 31c | Plans, if any, for granting public access to the full protocol, participant-  |
| 58 |                   |     | level dataset, and statistical code                                           |
| 59 |                   |     |                                                                               |
| 60 |                   |     |                                                                               |

## Appendices

|                            |    |                                                                                                                                                                                                |
|----------------------------|----|------------------------------------------------------------------------------------------------------------------------------------------------------------------------------------------------|
| Informed consent materials | 32 | Model consent form and other related documentation given to participants and authorised surrogates                                                                                             |
| Biological specimens       | 33 | Plans for collection, laboratory evaluation, and storage of biological specimens for genetic or molecular analysis in the current trial and for future use in ancillary studies, if applicable |

---

\*It is strongly recommended that this checklist be read in conjunction with the SPIRIT 2013 Explanation & Elaboration for important clarification on the items. Amendments to the protocol should be tracked and dated. The SPIRIT checklist is copyrighted by the SPIRIT Group under the Creative Commons "[Attribution-NonCommercial-NoDerivs 3.0 Unported](#)" license.

For peer review only



# BMJ Open

## Impact of a compression garment, on top of the usual care, in breast cancer patients with early disturbance of the lymphatic transport: protocol of a randomized controlled trial.

|                                 |                                                                                                                                                                                                                                                                                                                                                                                                     |
|---------------------------------|-----------------------------------------------------------------------------------------------------------------------------------------------------------------------------------------------------------------------------------------------------------------------------------------------------------------------------------------------------------------------------------------------------|
| Journal:                        | <i>BMJ Open</i>                                                                                                                                                                                                                                                                                                                                                                                     |
| Manuscript ID                   | bmjopen-2020-042018.R1                                                                                                                                                                                                                                                                                                                                                                              |
| Article Type:                   | Protocol                                                                                                                                                                                                                                                                                                                                                                                            |
| Date Submitted by the Author:   | 27-Oct-2020                                                                                                                                                                                                                                                                                                                                                                                         |
| Complete List of Authors:       | thomis, sarah; KU Leuven University Hospitals Leuven, Vascular Surgery<br>Devoogdt, Nele; KU Leuven, Rehabilitation Sciences<br>Bechter-Hugl, Beate; KU Leuven University Hospitals Leuven, Vascular Surgery<br>Nevelsteen, Ines; KU Leuven University Hospitals Leuven, Vascular Surgery<br>Neven, P.; Univ Hosp Leuven<br>Fourneau, Inge; KU Leuven University Hospitals Leuven, Vascular Surgery |
| <b>Primary Subject Heading</b>: | Cardiovascular medicine                                                                                                                                                                                                                                                                                                                                                                             |
| Secondary Subject Heading:      | Oncology                                                                                                                                                                                                                                                                                                                                                                                            |
| Keywords:                       | Breast tumours < ONCOLOGY, Cardiovascular imaging < RADIOLOGY & IMAGING, Vascular surgery < SURGERY                                                                                                                                                                                                                                                                                                 |
|                                 |                                                                                                                                                                                                                                                                                                                                                                                                     |

SCHOLARONE™  
Manuscripts



I, the Submitting Author has the right to grant and does grant on behalf of all authors of the Work (as defined in the below author licence), an exclusive licence and/or a non-exclusive licence for contributions from authors who are: i) UK Crown employees; ii) where BMJ has agreed a CC-BY licence shall apply, and/or iii) in accordance with the terms applicable for US Federal Government officers or employees acting as part of their official duties; on a worldwide, perpetual, irrevocable, royalty-free basis to BMJ Publishing Group Ltd ("BMJ") its licensees and where the relevant Journal is co-owned by BMJ to the co-owners of the Journal, to publish the Work in this journal and any other BMJ products and to exploit all rights, as set out in our [licence](#).

The Submitting Author accepts and understands that any supply made under these terms is made by BMJ to the Submitting Author unless you are acting as an employee on behalf of your employer or a postgraduate student of an affiliated institution which is paying any applicable article publishing charge ("APC") for Open Access articles. Where the Submitting Author wishes to make the Work available on an Open Access basis (and intends to pay the relevant APC), the terms of reuse of such Open Access shall be governed by a Creative Commons licence – details of these licences and which [Creative Commons](#) licence will apply to this Work are set out in our licence referred to above.

Other than as permitted in any relevant BMJ Author's Self Archiving Policies, I confirm this Work has not been accepted for publication elsewhere, is not being considered for publication elsewhere and does not duplicate material already published. I confirm all authors consent to publication of this Work and authorise the granting of this licence.

1  
2  
3 **Impact of a compression garment, on top of the usual care, in breast cancer**  
4 **patients with early disturbance of the lymphatic transport: protocol of a**  
5 **randomized controlled trial.**  
6  
7

8 Sarah Thomis<sup>1,2</sup>, Nele Devoogdt<sup>1,3</sup>, Beate Bechter-Hugl<sup>1</sup>, Ines Nevelsteen<sup>4</sup>, Patrick Neven<sup>4</sup>, Inge  
9 Fourneau<sup>1,2</sup>  
10

11  
12  
13 <sup>1</sup>UZ Leuven – University Hospitals Leuven, Department of Vascular Surgery, Centre for Lymphedema,  
14 Leuven, Belgium

15  
16 <sup>2</sup>KU Leuven – University of Leuven, Department of Cardiovascular Sciences, Research unit Vascular  
17 Surgery, Leuven, Belgium

18  
19 <sup>3</sup>KU Leuven – University of Leuven, Department of Rehabilitation Sciences, Leuven, Belgium

20  
21 <sup>4</sup>UZ Leuven – University Hospitals Leuven, Multidisciplinary Breast Centre, Leuven, Belgium  
22  
23

24 **Corresponding author:**

25 Sarah Thomis, MD

26 University Hospitals Leuven

27 Department of Vascular Surgery – Center for lymphedema

28 Herestraat 49

29 3000 Leuven

30 Belgium

31 Email: [sarah.thomis@uzleuven.be](mailto:sarah.thomis@uzleuven.be)

32 Tel : +3216346948

33 Fax : +3216346852  
34  
35

36  
37  
38  
39  
40  
41  
42  
43 Word count: 3342  
44  
45  
46  
47  
48  
49  
50  
51  
52  
53  
54  
55  
56  
57  
58  
59  
60

## ABSTRACT

### Introduction

Breast-cancer related lymphedema (BCRL) is a common phenomenon. When lymphedema is diagnosed late, options for treatment are diminished. Therefore, early diagnosis and treatment are very important to alter the potential deleterious evolution. Lymphofluoroscopy visualizes the superficial lymphatic architecture in detail, giving the opportunity to detect a disturbance in the lymphatic transport (i.e. dermal backflow) before the lymphedema is clinically visible.

The main objective is to investigate if there is an additional effect of a compression garment on top of the usual care (i.e. information and exercises) in patients with early disturbance of the lymphatic transport after breast cancer treatment. Development of clinical lymphedema and/or deterioration of the dermal backflow visualized by lymphofluoroscopy is investigated.

### Methodology

All patients scheduled for breast cancer surgery with unilateral axillary lymph node dissection or sentinel node biopsy in the Multidisciplinary Breast Clinic of the University Hospitals Leuven are being considered. Patients are assessed before surgery and at 1, 3, 6, 9, 12, 18, 24 and 36 months postoperatively. At each visit a clinical assessment is performed determining the volume difference between both arms and hands (through circumference measurements and water displacement), the water content, the extracellular fluid, the pitting status and the skinfold thickness. Quality of life questionnaires are filled in. At each visit a lymphofluoroscopy is performed as well. When a disturbance of the lymphatic transport is seen on lymphofluoroscopy, without the presence of clinical lymphedema, the patient is randomized in either a control group receiving usual care or a preventive treatment group receiving usual care and a compression garment (whether or not combined with a glove).

### Ethics and dissemination

The trial is conducted in compliance with the principles of the Declaration of Helsinki (2008), the principles of GCP and in accordance with all applicable regulatory requirements. This protocol has been

1  
2  
3 approved by the Ethical Committee of the University Hospitals Leuven. Results will be disseminated  
4  
5 by peer-reviewed scientific journals and presentation at international congresses.  
6

7 **Trial registration number** NCT 03210311  
8

### 9 **Conclusion**

10  
11 The investigators hypothesize that development of clinical BCRL can be prevented and/or the dermal  
12  
13 backflow can be stabilized or improved, if a preventive treatment with compression garment is started  
14  
15 in the early phase of disturbance.  
16  
17  
18  
19  
20  
21  
22  
23  
24  
25  
26  
27  
28  
29  
30  
31

### 32 **STRENGTHS AND LIMITATIONS**

- 33  
34 - This is the first study to investigate the additional effect of early treatment in breast cancer  
35 patients with a disturbance on lymphofluoroscopy.  
36  
37 - This is a prospective, randomized controlled trial.  
38  
39 - Lymphofluoroscopy and clinical measurements are performed preoperative and at regular  
40 times up to three years after surgery for breast cancer.  
41  
42 - This study is powered for the primary outcomes incidence of clinical lymphedema and  
43 deterioration of dermal backflow.  
44  
45  
46  
47

48 **Key words:** Lymphedema, ICG lymphofluoroscopy, near-infrared fluorescence, early detection  
49  
50  
51  
52  
53  
54  
55  
56  
57  
58  
59  
60

## INTRODUCTION

Lymphedema is a chronic and debilitating disease caused by imbalance between lymph production and lymph transport. It reduces patient's quality of life by limb enlargement but also by other physical and psychosocial problems, e.g. decreased mobility, recurrent infections, stress and decreased ability to perform occupational activities.<sup>1,2,3</sup>

Breast cancer-related lymphedema (BCRL) is a secondary lymphedema of the upper limb that can occur after treatment for breast cancer. Incidence of BCRL vary in literature, especially since the introduction of less invasive techniques such as sentinel node procedures and radiotherapy. According to a review of DiSipio et al., the incidence of arm lymphedema was about four times higher in women who had an axillary lymph node dissection (19.9%) than after sentinel lymph node biopsy (5.6%).<sup>4,5</sup> A study by Rockson et al. suggested that in almost 75% of the cases, lymphedema is established within the first year after breast cancer treatment.<sup>6</sup> A volume difference between both limbs of 5 to 10% is normally used to define clinical lymphedema.<sup>4,7</sup>

Lymphedema can progress from a soft pitting edema to a hard fibrotic or soft fatty and non-pitting edema because of lipogenesis, fibrosis, inflammation, lymphangiogenesis and immunosuppression.<sup>8,9</sup>

There is no consensus concerning the best measuring tool to detect the development of BCRL.<sup>10,11</sup>

Volume increase of the limb can be assessed with circumference measurements<sup>12</sup> or with the water displacement method.<sup>13,14</sup> A relative volume change between both arms is used, comparing preoperative measurements between the affected arm and the healthy arm, to the postoperative measurements.<sup>7</sup> In addition, the increase of water content in the edematous limb can be assessed by the pitting test,<sup>15</sup> by measuring the extracellular fluid (bioelectrical impedance spectroscopy)<sup>16</sup> or by measuring the water content of the skin (tissue dielectric constant).<sup>17,18</sup> Measurement of the skinfold thickness (Stemmer sign) can be performed, which is the typical sign for lymphedema.<sup>19</sup>

Historically lymphangiography has been the technique to image the lymphatic system. This technique is difficult to perform and has become obsolete.<sup>20</sup> Lymphoscintigraphy has replaced lymphangiography and became the new standard for imaging the lymphatic system. With lymphoscintigraphy a radionuclide (<sup>99m</sup>Tc-labeled tracer) is injected and followed by sequential gamma imaging.<sup>21,22</sup> This technique not only provides dynamic imaging of the lymphatics and the lymph nodes, but also provides semi-quantitative data of radionuclide transport and lymph node absorption. Near-infrared fluorescence imaging or lymphofluoroscopy is another minimally invasive technique. The injection of indocyanine green (ICG) intradermally allows to visualize lymphatics in the upper 2 cm of the skin using an infrared camera system, capturing the fluorescence.<sup>23,24</sup> It provides real-time relatively high-resolution images and detailed information about the superficial lymphatic transport.<sup>25</sup> The images themselves are classified in different patterns: a normal linear lymph transport pattern and three

1  
2  
3 dysfunctional dermal backflow (DB) patterns. The first dysfunctional pattern is the splash pattern,  
4 representing a dispersed tracer in tortuous lymphatic channels. The second is the stardust pattern,  
5 which demonstrates spotted fluorescent signals, representing the effusion of lymph fluid into the  
6 interstitium. The last type is the diffuse pattern wherein the tracer is widely distributed without  
7 identifiable spots. In this pattern, besides accumulation in the lymphatic capillaries and lymph  
8 precollectors, lymph stagnates in the interstitium.<sup>25,26</sup> Different studies have demonstrated that  
9 lymphofluoroscopy is a valid imaging technique to evaluate superficial lymphatic transport in patients  
10 with BCRL<sup>27,28</sup> and can be used for early detection of BCRL.<sup>29</sup>

11  
12 To prevent further evolution to fibrous and fatty tissue, early start of BCRL treatment is  
13 recommended.<sup>30,31</sup> Previous studies demonstrated that early detection of BCRL with clinical  
14 measurement tools such as bioelectrical impedance spectroscopy and volume measurements and  
15 subsequently early start of manual lymph drainage and exercise, reduces the rate of clinical  
16 lymphedema.<sup>32,33</sup> Encouraging participation in regular exercise and maintaining healthy body weight  
17 as well as giving information such as avoiding infection, heat and tight clothing are guidelines to  
18 prevent lymphedema.<sup>34</sup> The previous studies investigated the effect of early treatment by using  
19 clinical assessments. The optimal tool to use remains unclear, and furthermore patient subjective  
20 symptoms and extremity volume can vary depending on the timing of measurement (morning and  
21 evening), the temperature, the activities performed by the patient during the day,...<sup>35,36</sup> thus not  
22 reliable for lymphedema diagnosis. Subclinical lymphedema should be diagnosed with lymphatic  
23 imaging.

24  
25 Therefore, the aim of this study is to investigate the additional effect of wearing a compression  
26 garment on top of the usual care (i.e. exercise and information), on the incidence of clinical  
27 lymphedema and/or deterioration of the dermal backflow visualized by lymphofluoroscopy, in  
28 patients developing early disturbance after treatment for breast cancer.

## 29 30 31 32 33 34 35 36 37 38 39 40 41 42 43 44 45 **METHODOLOGY**

### 46 47 48 ***Trial design***

49  
50  
51 This study is a prospective randomised controlled trial. Figure 1 gives an overview of the participant  
52 flow in the trial. All participants are assessed at the Department of Vascular Surgery of the University  
53 Hospitals Leuven. The trial started in November 2017 and will end in May 2023.

54  
55 The trial has been approved by the Ethical Committee of the University Hospitals Leuven (CME  
56 reference S60382, EudraCT Number 2017-002306-12). The study has been registered in  
57 clinicaltrials.gov (NCT 03210311).  
58  
59  
60

### ***Patient and public involvement***

The protocol was discussed extensively with the oncologists of the Multidisciplinary Breast Clinic. Patients with BCRL were involved in the trial design and the methods of assessing the lymphedema. They were informed through information sessions at the center for lymphedema. The results of the study will be communicated in a symposium organized for patients recruited in the study and the patients whom were involved in the trial design.

### ***Participants***

All patients scheduled for breast surgery combined with either unilateral axillary lymph node dissection (ALND) or sentinel node biopsy (SNB) in the Multidisciplinary Breast Clinic Center at the University Hospitals Leuven are screened for participation in the study.

Recruitment started in November 2017. Inclusion criteria were 1) Age  $\geq 18$ y, 2) women/men with breast cancer and scheduled for unilateral ALND or SNB, 3) oral and written approval of informed consent, 4) understanding Dutch. Exclusion criteria were 1) edema of the upper limb from other causes, 2) cannot participate during the entire study period, 3) mentally or physically unable to participate in the study, 4) contra-indication for the use of ICG: allergy to ICG, iodine, hyperthyroidism, 5) metastatic disease.

All patients receives written as well as oral information. All included patients sign an informed consent document prior to the start of the study.

### ***Assessments***

Figure 1 gives an overview of the different assessments and their timing in the trial. All assessments are performed at baseline and at 1, 3, 6, 9, 12, 18, 24 and 36 months postoperatively.

*Near-infrared fluorescence imaging of the lymphatic system or lymphofluoroscopy*



1  
2  
3 All lymphofluoroscopic assessments are performed by one person (ST) who is blinded to the  
4 participant's data as well as to the assigned group if relevant.  
5

6 During lymphofluoroscopy, ICG is injected intradermally in the first and fourth webspace of the hand  
7 on the affected side. An infrared camera system (PDE, Hamamatsu®) captures the fluorescence. The  
8 procedure consists of three consecutive phases (table 1): an early phase, a break and a late phase. All  
9 information about the lymphatic transport is documented in a standard evaluation document and in  
10 case of disturbance, this information is drawn on a body diagram according to the legend (Figure 2).  
11  
12  
13  
14  
15

### 16 *Clinical assessments*

17  
18  
19  
20 The clinical assessments are performed by one assessor. In order to ensure blinding of the assessor,  
21 participants are asked not to share any information concerning their treatment (e.g. wearing  
22 compression garment or not) neither to wear their compression material during evaluations. In  
23 addition, the assessor is blinded to previous measurement data in order to avoid being influenced by  
24 previous results.  
25  
26  
27

28 Table 2 and 3 provides a detailed overview of the clinical evaluation methods and procedures  
29 performed. Figure 3 shows the reference points used for the local clinical assessments.  
30  
31  
32

### 33 *Randomization and allocation sequence generation*

34  
35  
36  
37 After visualization of an early disturbance of the lymphatic transport, without the presence of clinical  
38 lymphedema, patients are randomized in either the control group or the preventive treatment group.  
39 Randomization is performed according to 'www.randomization.com'. This generator randomizes each  
40 subject to a single treatment by using the method of randomly permuted blocks. Assessments are  
41 performed by a person blinded to the treatment allocation groups.  
42  
43  
44  
45  
46  
47

### 48 *Interventions*

49  
50  
51 During hospitalization all participants receive information about the prevention of lymphedema. They  
52 are advised to avoid lifting heavy objects, but to use the affected arm as normally as possible. Limb  
53 constriction and extremes of temperatures should be avoided. In case of heaviness the arm should be  
54 elevated. Skin care is recommended, and gain in body weight should be avoided to prevent  
55 lymphedema. Patients receive a brochure which outlines these guidelines.  
56  
57  
58  
59  
60

1  
2  
3 Participants are prescribed exercise therapy, which is started during hospitalization with low level  
4 mobilizing exercises for the hand, elbow and shoulder. After hospitalization, these exercises are  
5 continued. Patients who underwent ALND are going to a physical therapist nearby to continue physical  
6 therapy such as passive mobilization of the shoulder, stretching and transverse strain of the breast  
7 muscles, scar tissue massage and active mobilizing and stabilizing exercises. This starts twice a week  
8 and frequency is gradually diminished. Exercises are continued until a full range of motion is reached.  
9  
10 When a seroma is present intensity of exercises is diminished. Patients who underwent SNB are not  
11 routinely seen by a physical therapist after discharge. If functional shoulder problems are seen at  
12 discharge or at follow-up consultation, physical therapy is prescribed. Patients are encouraged to do  
13 exercises at home twice a day until full range of motion is reached.

14  
15 If early disturbance is seen on lymphofluoroscopy at a control visit, the patient is randomized in either  
16 the preventive treatment group or the control group. In the control group, the usual care is continued  
17 consisting of preventive measures and exercises as described above. The participants in the preventive  
18 treatment group receive the usual care and a compression garment whether or not combined with a  
19 glove on top. The compression garment is measured by an experienced compression specialist. The  
20 first choice is a round knitted custom-made compression garment, compression class 2 (23 -32 mmHg).  
21 If patients are not comfortable with this garment, a flat-knitted garment is ordered. If the hand shows  
22 swelling after wearing the garment, a glove is measured. Patients need to wear the garment/glove at  
23 daytime during the remaining follow-up time of the trial. Written instructions for washing and  
24 maintenance of the garment and glove are given. Patients receive a new garment/glove every 6  
25 months. A compression questionnaire is filled in at every visit to assess adherence and adverse events  
26 of the compression material.

27  
28 If clinical lymphedema is established the patient receives the normal standard of care treatment for  
29 lymphedema with decongestive lymphatic therapy. Patients are referred to a specialized physical  
30 therapist or to the UZ Leuven center for lymphedema.

### 31 32 33 **Primary outcomes**

34  
35 The primary outcomes are the incidence of clinical lymphedema of the arm/hand measured by  
36 circumference measurements and volume displacement defined as 5% volume increase compared to  
37 the contralateral side (first primary outcome) and the proportion of subjects with deterioration of the  
38 dermal backflow measured by lymphofluoroscopy (second primary outcome) (see table 2).

### 39 40 41 **Secondary outcomes**

1  
2  
3 Secondary outcome measures are: the incidence of clinical lymphedema of the arm/hand based on  
4 the extracellular fluid content, based on the water content, based on thickening of the skinfold, the  
5 relative change of arm volume, the severity of disturbance of lymphatic transport, the change in  
6 functional problems related to the lymphedema and the change in health-related quality of life (see  
7 table 3).  
8  
9  
10

### 11 12 13 **Sample size calculation** 14

15  
16 For both hypotheses a sample size calculation is performed.

17  
18 For the hypothesis that the incidence rate of clinical lymphedema will be lower in the preventive  
19 treatment group than in the control group, we estimate that 50% of the patients in the control group  
20 will develop clinical lymphedema in the first year after the randomization compared to 5% in the  
21 preventive treatment group (wearing a compression garment). The 5% is based on previous studies.<sup>30-</sup>  
22  
23 <sup>32</sup> A study of Stout<sup>30</sup> treated patients, diagnosed with subclinical lymphedema, defined as a volume  
24 difference between both limbs of  $\geq 3\%$ , with a compression garment. The incidence of lymphedema  
25 (stage I/II) at 5 year was 5.6%. Another trial showed that the same type of treatment reduced the  
26 incidence of lymphedema to 4.4%.<sup>31</sup> The 50% incidence of clinical lymphedema in the control group is  
27 based on expert opinion.  
28  
29

30  
31 The sample size calculation is based on the formula in Diggle for a longitudinal study for showing a  
32 time-averaged treatment effect for a binary outcome. Four time points per patient are foreseen (12m,  
33 18m, 24m, 36m). Conservatively a high correlation of 0.90 between repeated measurements is  
34 assumed (higher correlation means larger sample size). Based on a power of 80% and 2.5% significance  
35 level (with a Bonferroni correction for multiple testing given that we test two outcomes, and keeping  
36 a family-wise alpha of 5%), we need a sample size of 14 patients per group. Taking into account a drop-  
37 out rate of 10%, 16 patient per group or a total of 32 randomized patients are needed.  
38  
39  
40  
41  
42  
43  
44  
45

46  
47 For the hypothesis that patients in the preventive treatment group will have less deterioration of  
48 dermal backflow visualized by lymphofluoroscopy, we estimate that a deterioration of the dermal  
49 backflow can be expected in 40% of the cases in the preventive treatment group in contrast to 90% in  
50 the control group. There is one publication studying early detection with lymphofluoroscopy and the  
51 changes of the dermal backflow pattern in case of early treatment. Therapy consists of exercise, skin  
52 care, elevation and the use of a compression garment. This trial shows that only three out of 35  
53 patients with dermal backflow deteriorate during the follow-up.<sup>29</sup> Deterioration was described as a  
54 change in severity of the dermal backflow pattern. In our study also the area of dermal backflow is  
55 taken into account, therefore we estimate a higher rate of deterioration. The 90% deterioration in the  
56  
57  
58  
59  
60

1  
2  
3 control group is based on expert opinion. The analysis is performed on a binary response (worsening  
4 versus stable condition/ improvement). Sample size calculation is completely analogous to the first  
5 outcome, leading to a total sample size of 30 patients after taking into account 10% of drop-out.  
6  
7

8  
9  
10 To calculate the total amount of patients to be included in the present trial two prospective  
11 observational studies about the incidence of subclinical lymphedema were considered<sup>30-32</sup> and one  
12 study about lymphofluoroscopic observations.<sup>29</sup> In the study by Akita, 196 patients are included in a 1-  
13 year follow-up study with lymphofluoroscopy. Twenty-five percent of the patients developed a dermal  
14 backflow pattern on lymphofluoroscopy.<sup>29</sup> The largest of both sample sizes, i.e. 32 patients, is adopted.  
15 We estimate that in 25% of the patients an early disturbance will be seen, hence 128 patients are  
16 included in the trial.  
17  
18  
19  
20  
21  
22

### 23 **Statistical methods**

24  
25  
26 Logistic regression analysis will be used for both primary endpoints, studying the difference between  
27 the preventive treatment and control group over the follow-up period. Generalized estimating  
28 equations (GEE) are used to account for repeated measurement. Model covariates include time and  
29 treatment group. The main effect of the preventive treatment group is estimated and presented by  
30 odds ratios with 95% confidence intervals. Both analyses are tested at the 2.5% significance level.  
31  
32

33 All data is analyzed according to the intention to treat principle.  
34

35 A 5% level of significance is applied for all secondary analyses.  
36  
37  
38  
39

### 40 **Monitoring**

41  
42  
43 There are no indications for setting up a data monitoring committee.  
44

45 No adverse events (AE) are expected. AE will be reported during the entire trial period, i.e. 36 months.  
46

47 It will be specified that the investigator(s) and the institution(s) will permit trial-related monitoring,  
48 audits, EC review, and regulatory inspections (where appropriate) by providing direct access to  
49 source data and other documents (i.e. patients' case files).  
50  
51  
52  
53

### 54 **DISCUSSION**

55  
56  
57 This is the first randomized controlled clinical trial investigating the additional effect of wearing a  
58 compression garment, to the usual care (i.e. information and exercises), on the incidence of clinical  
59  
60

1  
2  
3 lymphedema and/or deterioration of the dermal backflow visualized by near infrared fluorescence  
4 imaging, in patients with early disturbance of the lymphatic transport (i.e. dermal backflow) after  
5 treatment for breast cancer. If treatment can start in this early phase of disturbance, further evolution  
6 to clinical lymphedema can perhaps be prevented.  
7  
8  
9

## 10 11 **ETHICS AND DISSEMINATION**

12  
13 The trial is conducted in compliance with the principles of the Declaration of Helsinki (2008), the  
14 principles of GCP and in accordance with all applicable regulatory requirements. This protocol and  
15 related documents has been approved by the Ethical Committee of the University Hospitals Leuven  
16 (CME reference S60382, EudraCT Number 2017-002306-12). The study has been registered in  
17 clinicaltrials.gov (NCT 03210311).  
18  
19  
20  
21  
22

23 The study can and will be conducted only on the basis of prior informed consent by the participants,  
24 or their legal representatives, to participate in the study. The investigator will obtain a signed informed  
25 consent form (ICF) for all patients prior to their enrollment and participation in the study in compliance  
26 with all applicable laws, regulations and the approval of the Ethics Committee. The investigator will  
27 retain such ICFs in accordance with the requirements of all applicable regulatory agencies and laws.  
28  
29

30 The investigator will treat all information and data relating to the study disclosed as confidential and  
31 shall not disclose such information to any third parties or use such information for any purpose other  
32 than the performance of the study. The collection, processing and disclosure of personal data, such as  
33 patient health and medical information is subject to compliance with applicable personal data  
34 protection and the processing of personal data (Directive 95/46/EC and Belgian law of December 8,  
35 1992 on the Protection of the Privacy in relation to the Processing of Personal Data).  
36  
37  
38  
39

40 Data are anonymous if no one, not even the researcher, can connect the data to the individual who  
41 provided it. No identifying information is collected from the individual.  
42  
43  
44

45 When data are coded, there continues to be a link between the data and the individual who provided  
46 it. The research team is obligated to protect the data from disclosure outside the research according  
47 to the terms of the research protocol and the informed consent document. The subject's name or  
48 other identifiers is stored separately (site file) from the research data and replaced with a unique code  
49 to create a new identity for the subject. The data are stored on a shared file. Only the principle  
50 investigator, sub-investigators and project co-workers (after permission from the principle  
51 investigator) have access to the patient file.  
52  
53  
54  
55  
56  
57

58 The authors declare that they have no known competing financial interests or personal relationships  
59 that could have appeared to influence the work reported in this paper.  
60

1  
2  
3  
4  
5 The results of the study will be send for publication to a peer-review journal. Participants and  
6 healthcare providers will be invited for a symposium to communicate the trial results.  
7  
8  
9

#### 10 **ACKNOWLEDGMENTS**

11  
12  
13 The authors are very grateful to the Multidisciplinary Breast Clinic for collaborating in this study. The  
14 authors also extend very grateful thanks to the study participants and the patients who were involved  
15 in the design of the study.  
16  
17  
18  
19

#### 20 **CONTRIBUTERSHIP STATEMENT**

21 ST drafted the manuscript. ST is the principal investigator of the DEARLY trial. BBH, IF, ND, IN and PN  
22 contributed substantially to the establishment of the protocol, revised the manuscript for important  
23 intellectual content and provided input according to their area of expertise. All authors approved the  
24 final version and agreed to be accountable for all aspects of the work in ensuring that questions related  
25 to the accuracy or integrity of any part of the work are appropriately investigated and resolved.  
26  
27  
28  
29

#### 30 **COMPETING INTERESTS**

31  
32 The authors declare that they have no known competing financial interests or personal relationships  
33 that could have appeared to influence the work reported in this paper.  
34  
35  
36  
37

#### 38 **FUNDING STATEMENT**

39 The Dearly trial is financed by the Clinical Research Fund of the University Hospitals Leuven, KOOR  
40 2017, S60382.  
41  
42  
43  
44  
45  
46  
47

#### 48 **REFERENCES**

- 49  
50  
51  
52  
53  
54  
55  
56  
57  
58  
59  
60
1. The diagnosis and treatment of peripheral lymphedema: 2020 Consensus Document of the International Society of Lymphology. *Lymphology*.2020;5:3-19.
  2. Morgan PA, Franks PJ, Moffatt CJ. Health-related quality of life with lymphedema: a review of the literature. *Int Wound J*. 2005;2:47-62.
  3. Saito Y, Nakagami H, Kaneda Y, Morishita R. Lymphedema and therapeutic lymphangiogenesis. *Biomed Res Int*. 2013.
  4. DiSipio T, Rye S, Newman B, Hayes S. Incidence of unilateral arm lymphedema after breast cancer: a systematic review and meta-analysis. *Lancet Oncol*. 2013 May;14(6):500-515.

- 1
  - 2
  - 3
  - 4
  - 5
  - 6
  - 7
  - 8
  - 9
  - 10
  - 11
  - 12
  - 13
  - 14
  - 15
  - 16
  - 17
  - 18
  - 19
  - 20
  - 21
  - 22
  - 23
  - 24
  - 25
  - 26
  - 27
  - 28
  - 29
  - 30
  - 31
  - 32
  - 33
  - 34
  - 35
  - 36
  - 37
  - 38
  - 39
  - 40
  - 41
  - 42
  - 43
  - 44
  - 45
  - 46
  - 47
  - 48
  - 49
  - 50
  - 51
  - 52
  - 53
  - 54
  - 55
  - 56
  - 57
  - 58
  - 59
  - 60
5. Gebruers N, Verbelen H, De Vrieze T, Coeck D, Tjalma W. Incidence and time path of lymphedema in sentinel node negative breast cancer patients: a systematic review. *Arch Phys Med Rehabil.* 2015;96(6):1131-1139.
  6. Rockson SG. Precipitating factors in lymphedema: myths and realities. *Cancer* 1998;83:2814-2816.
  7. Sun F, Skolny M, Swaroop M, Rawal B, Catalano P, Brunelle C et al. The need for preoperative baseline arm measurement to accurately quantify breast cancer-related lymphedema. *Breast Cancer Re Treat* 2016;157: 229-240
  8. Carlson JA. Lymphedema and subclinical lymphostasis (microlymphedema) facilitate cutaneous infection, inflammatory dermatoses, and neoplasia: A locus minoris resistentiae *Clin Dermatol.* 2014 Sep-Oct;32(5):599-615.
  9. Michelini S, Campisi C, Gasbarro V, Allegra C, Conte M, Cestari M, Molisso A, Cavezzi A, Mattassi R, Aiello A, Ricci M, Zanetti L. National guidelines on lymphedema. *Lymphology* 2007;55:238-242.
  10. International Society of Lymphology. The diagnosis and treatment of peripheral lymphedema: 2013 Consensus Document of the international society of lymphology. *Lymphology* 2013; 46: 1-11.
  11. De Vrieze T, Gebruers N, Tjalma WA, Nevelsteen I, Thomis S, De Groef A et al. What is the best method to determine excessive arm volume in patients with breast cancer-related lymphedema in clinical practice? Reliability, time efficiency and clinical feasibility of five different methods. *Clin Rehabil.* 2019 Jul;33(7):1221-1232.
  12. Devoogdt N, Lemkens H, Geraerts I, Van Nuland I, Flour M, Coremans T, et al. A new device to measure upper limb circumferences: validity and reliability. *Int Angiol* 2010; 29: 401-407.
  13. Gebruers N, Truijen S, Engelborghs S, De Deyn PP. Volumetric evaluation of upper extremities in 250 healthy persons. *Clin Physiol Funct Imaging* 2007;27(1):17-22.
  14. Damstra RJ, Glazenburg EJ, Hop WC. Validation of the inverse water volumetry method: A new gold standard for arm volume measurements. *Breast Cancer Res Treat* 2006;99(3):267-273.
  15. Sanderson J, Tuttle N, Box R, Reul-Hirche H.M. The pitting test: an investigation of an unstandardized assessment of lymphedema. *Lymphology* 2015; 48: 175-183.
  16. Cornish B. Bioimpedance Analysis: Scientific Background. *Lymphat Res Biol.* 2006; 4: 47-50.
  17. Mayrovitz HN, Weingrad DN, Davey S. Local tissue water in at-risk and contralateral forearms of women with and without Breast. *Lymphat Res Biol.* 2009; 7: 153-158.
  18. Mayrovitz HN, Weingrad DN, Lopez L. Tissue dielectric constant (TDC) as an index of skin water in women with and without breast cancer: upper limb assessment via a self-contained compact measurement device. *Lymphology.* 2016; 49: 27-35.
  19. Brorson H. Liposuction in arm lymphedema treatment. *Scand J Surg* 2003; 92: 287-295.
  20. Kinmonth JB, Taylor GW, Tracy GD, Marsh JD. Primary lymphedema: clinical and lymphangiographic studies in a series of 107 patients in which the lower limbs were affected. *Br J Surg.* 1957;45:1-10.
  21. Henze E, Schelbert HR, Collins JD, Najafi A, Barrio JR, Bennett LR. Lymphoscintigraphy with Tc-99m-Labeled Dextran. *J Nucl Med* 1982; 23:923-929.
  22. Szuba A, Shin W, Strauss W, Rockson S. The Third circulation: Radionuclide Lymphoscintigraphy in the evaluation of lymphedema. *J Nucl Med* 2003;44:43-57.
  23. Rasmussen J, Tan I, Marshall M, Adams K, Kwon S, Fife C, Maus E, Smith L, Covington K, Sevick-Muraca E. Human lymphatic architecture and dynamic transport imaged using Near-infrared Fluorescence. *Transl oncology* 2010;3:362-372.
  24. Tan I, Maus E, Rasmussen J, Marshall M, Adams K, Hife C, Smith L, Chan W, Sevick-Muraca E. Assessment of Lymphatic Contractile Function after manual lymphatic drainage using near-infrared fluorescence imaging. *Arch Phys Med Rehabil* 2011; 92:756-764.

- 1
  - 2
  - 3
  - 4
  - 5
  - 6
  - 7
  - 8
  - 9
  - 10
  - 11
  - 12
  - 13
  - 14
  - 15
  - 16
  - 17
  - 18
  - 19
  - 20
  - 21
  - 22
  - 23
  - 24
  - 25
  - 26
  - 27
  - 28
  - 29
  - 30
  - 31
  - 32
  - 33
  - 34
  - 35
  - 36
  - 37
  - 38
  - 39
  - 40
  - 41
  - 42
  - 43
  - 44
  - 45
  - 46
  - 47
  - 48
  - 49
  - 50
  - 51
  - 52
  - 53
  - 54
  - 55
  - 56
  - 57
  - 58
  - 59
  - 60
25. Abbaci M, Conversano A, De Leeuw F, Laplace-Builhé C, Mazouni C. Near-infrared fluorescence imaging for the prevention and management of breast cancer-related lymphedema: A systematic review. *Eur J Surg Oncol*. 2019 Oct;45(10):1778-1786.
26. Yamamoto T, Yamamoto N, Doi K, Oshima A, Yoshimatsu H, Todokoro T, et al. Indocyanine green-enhanced lymphography for upper extremity lymphedema: a novel severity staging system using dermal backflow patterns. *Plast Reconstr Surg*. 2011; 128: 941-947.
27. Mihara M, Hara H, Araki J, Kikuchi K, Narushima M, Yamamoto T, Lida T. Indocyanine Green Lymphography is superior to lymphoscintigraphy for diagnostic imaging of early lymphedema of the upper limbs. *PLoS One* 2012 June;7(6): 1-9.
28. Akita S, Mitsukawa N, Kazama T, Kuriyama M, Kubota Y, Omori N, Koizumi T, Kosoka K, Uno T, Satoh K. Comparison of lymphoscintigraphy and indocyanine green lymphography for the diagnosis of extremity lymphedema. *J of Plast, reconst en Asth Surg* 2013: 2013 Jun;66(6):792-798.
29. Akita S, Nakamura R, Yamamoto N, Tokumoto H et al. Early detection of lymphatic disorder and treatment for lymphedema following breast cancer. *Plast Reconstr Surg* 2016;138:192-202.
30. Stout N, Pfalzer L, McGarvey C, Springer B, Gerber L, Soballe P. Preoperative assessment enables the early diagnosis and successful treatment of lymphedema. *Cancer* 2008;112:2809-2819.
31. Soran A, Ozmen T, McGuire K, Diego E et al. The importance of detection of subclinical lymphedema for the prevention of breast cancer-related clinical lymphedema after axillary lymph node dissection; a prospective observational study. *Lymph Res Biol* 2014;12(4): 289-294.
32. Shah C, Arthur D, Wazer D, Khan A, Ridner S, Vicini F. The impact of early detection and intervention of breast cancer-related lymphedema: a systematic review. *Cancer Medicine* 2016;5(6):1154-1162.
33. Gençay Can A, Ekşioğlu E, Çakçı FA. Early Detection and Treatment of Subclinical Lymphedema in Patients with Breast Cancer. *Lymphat Res Biol*. 2019;17(3):368-373.
34. Hayes S, Johanssen K, Stout N, Prosnitz R, Armer J, Gabram S et al. Upper-body morbidity after breast cancer: Incidence and evidence for evaluation, prevention, and management within a prospective surveillance of care. *Cancer* 2012;118:2237-2249.
35. Armer J, Stewart B. A comparison of four diagnostic criteria for lymphedema in a post breast cancer population. *Lymphatic Res Biol* 2005;3:208-217.
36. Czerniec S, Ward L, Kilbreath S. Breast Cancer-Related Arm Lymphedema: Fluctuation over Six Months and the Effect of the Weather. *Lymphat Res Biol* 2016;14:148-155.
37. Devoogdt N, Van Kampen M, Geraerts I, Coremans T, Christiaens MR. The Lymphoedema Functioning, Disability and Health (Lymph-ICF) questionnaire: reliability and validity. *Phys Ther*. 2011;91:944-957.
38. De Vrieze T, Coeck D, Verbelen H, Devoogdt N, Tjalma W, Gebruers N. Cross-cultural Psychometric Evaluation of the Dutch McGill-QoL Questionnaire for Breast Cancer Patients. *Facts Views Vis Ob gyn*. 2016;8(4):205-209



1  
2  
3 **List of Figures**  
4

5 Figure 1. Flow of participants in the trial  
6

7 Figure 2. Example of body diagram  
8

9  
10 Figure 3. Description of the reference points needed for the local clinical assessments  
11  
12  
13  
14  
15  
16  
17

18  
19 **List of Tables**  
20

21 Table 1. Protocol near-infrared fluorescence imaging  
22

23 Table 2. Overview of measurement method and calculation of the primary outcomes  
24

25 Table 3. Overview of measurement method and calculation of the secondary outcome  
26  
27  
28  
29  
30  
31  
32  
33  
34  
35  
36  
37  
38  
39  
40  
41  
42  
43  
44  
45  
46  
47  
48  
49  
50  
51  
52  
53  
54  
55  
56  
57  
58  
59  
60

Table 1. Protocol near-infrared fluorescence imaging

| Step        |                                    | description                                                                                                                                                                                                                                                                                                                                                                                                                                                                     | reporting                                                                                                                                                                                                                                                                                                                                                                                                                                                                                                 |
|-------------|------------------------------------|---------------------------------------------------------------------------------------------------------------------------------------------------------------------------------------------------------------------------------------------------------------------------------------------------------------------------------------------------------------------------------------------------------------------------------------------------------------------------------|-----------------------------------------------------------------------------------------------------------------------------------------------------------------------------------------------------------------------------------------------------------------------------------------------------------------------------------------------------------------------------------------------------------------------------------------------------------------------------------------------------------|
| Preparation | 0.1 Dilution of ICG                | Suspended ICG in 25 ml pure water and subsequently diluted with saline water to reach a final concentration of 0.20 mg/ml                                                                                                                                                                                                                                                                                                                                                       |                                                                                                                                                                                                                                                                                                                                                                                                                                                                                                           |
|             | 0.2 Camera                         | Camera is held perpendicular to the observed skin at distance of 15 cm (best focus)                                                                                                                                                                                                                                                                                                                                                                                             |                                                                                                                                                                                                                                                                                                                                                                                                                                                                                                           |
|             | 0.3 Injection of ICG               | Intradermal injection in 1 <sup>st</sup> (ulnar injection point) and 4 <sup>th</sup> web space (radial injection point) dorsally in the hand<br>0.2 ml of the diluted solution is injected in each injection point                                                                                                                                                                                                                                                              | Time of injection                                                                                                                                                                                                                                                                                                                                                                                                                                                                                         |
| Early phase | 1.1 Rest: 1 min                    | Hand in resting position on table                                                                                                                                                                                                                                                                                                                                                                                                                                               | Linear transport starting from ulnar injection point: Yes / No (if "yes", after ..... sec)<br>Linear transport starting from radial injection point: Yes / No (if "yes", after ..... sec)                                                                                                                                                                                                                                                                                                                 |
|             | 1.2 Stimulation: 3 min             | Lymph capillaries at the level of the injection points are filled and transport through the lymph collectors is stimulated by the assessor                                                                                                                                                                                                                                                                                                                                      |                                                                                                                                                                                                                                                                                                                                                                                                                                                                                                           |
|             | 1.3 Scan with camera and measuring | 1) of the arm and shoulder with hand in pronation: starting at hand up to the retroclavicular region,<br>2) of the arm and axilla with hand in supination and abduction of the shoulder: starting at hand up to the axilla, together with the pectoral region: from the ipsilateral to the contralateral axilla,<br>3) of the scapular region: from the ipsilateral to the contralateral axilla,<br>4) of the pectoral region: from the ipsilateral to the contralateral axilla | After scan, reporting on an assessment form:<br><ul style="list-style-type: none"> <li>- Number of lymph collectors</li> <li>- Of each lymph collector: length (measured with tapeline in cm), location and normal versus dilated situation</li> <li>- Presence of splash, stardust and diffuse pattern and location (fingers, hand, proximal/ distal and ventral/ dorsal lower or upper arm, breast and trunk)</li> <li>- Number of lymph nodes (cubital, humeral, axillary, retroclavicular)</li> </ul> |

|            |                                      |                                                                                                                                          |                                               |
|------------|--------------------------------------|------------------------------------------------------------------------------------------------------------------------------------------|-----------------------------------------------|
| Break      | 30 min                               |                                                                                                                                          |                                               |
| Late phase | 3.1 Scan with camera and measuring   | See step 1.3                                                                                                                             | See step 1.3                                  |
|            | 3.2 Drawing on skin and body diagram | If disturbance is seen lymph collectors and dermal backflow (splash, stardust and diffuse) are designed on a body diagram (see figure 2) | Design on body diagram if disturbance is seen |

For peer review only

Table 2. Overview of measurement method and calculation of the primary outcomes

| Outcome parameter                                                                                                                                          | Measurement time, method, material                                                                                                                                                                                                                                                                                         | Calculation                                                                                                                                                                                                                                                                                                                                                                                                                                                                                                                                             |
|------------------------------------------------------------------------------------------------------------------------------------------------------------|----------------------------------------------------------------------------------------------------------------------------------------------------------------------------------------------------------------------------------------------------------------------------------------------------------------------------|---------------------------------------------------------------------------------------------------------------------------------------------------------------------------------------------------------------------------------------------------------------------------------------------------------------------------------------------------------------------------------------------------------------------------------------------------------------------------------------------------------------------------------------------------------|
| <p><i>Cumulative incidence of clinical lymphedema defined as:</i></p> <p>≥5% increase of relative arm volume difference compared to pre-surgical value</p> | <p>Before surgery, at 12M, 18M, 24M and 36M.</p> <p>With perimeter</p> <p>Circumferences at olecranon and 4, 8, 12, 16 and 20cm above and under olecranon of arm at affected and healthy side<sup>12</sup></p> <p>With volumeter, weighing balance and recipient</p> <p>Water displacement method hand<sup>13,14</sup></p> | <p>0 = No clinical lymphedema</p> <p>1 = Clinical lymphedema</p> <p>Relative arm volume difference compared to pre-surgical value = relative arm volume difference at assessment – relative arm volume difference at baseline</p> <p>Relative arm volume difference = (absolute arm volume difference/ arm volume healthy side) x 100</p> <p>Absolute arm volume difference = arm volume affected side – arm volume healthy side</p> <p>Arm volume = sum of volume of different arm segments determined by circumference measurements + hand volume</p> |

1  
2  
3  
4  
5  
6  
7  
8  
9  
10  
11  
12  
13  
14  
15  
16  
17  
18  
19  
20  
21  
22  
23  
24  
25  
26  
27  
28  
29  
30  
31  
32  
33  
34  
35  
36  
37  
38  
39  
40  
41  
42  
43  
44  
45  
46  
47  
48  
49  
50  
51  
52  
53  
54  
55  
56  
57  
58  
59  
60

|                                                                                |                                                                                                                                                  |                                                                                                                                                                                                                                                                                                                                                                           |
|--------------------------------------------------------------------------------|--------------------------------------------------------------------------------------------------------------------------------------------------|---------------------------------------------------------------------------------------------------------------------------------------------------------------------------------------------------------------------------------------------------------------------------------------------------------------------------------------------------------------------------|
|                                                                                |                                                                                                                                                  | <p>Arm segment = <math>4 \times (C_1^2 + C_1C_2 + C_2^2) / 12\pi</math>, where <math>C_1</math> is the upper circumference and <math>C_2</math> is the lower circumference of each segment (formula of the truncated cone)<sup>12</sup></p> <p>Hand volume = volume measured with volumeter</p>                                                                           |
| <p><i>Proportion of subjects with deterioration of the dermal backflow</i></p> | <p>At 12M, 18M, 24M and 36M.</p> <p>With lymphofluoroscopy: injecting ICG in the hand of the affected arm<sup>26</sup>, protocol see table 1</p> | <p>0 = Stabilization or improvement</p> <p>1 = Deterioration</p> <p>Stabilization: stable area of dermal backflow OR stable dermal backflow pattern</p> <p>Improvement: diminished area of dermal backflow OR diminished severity of dermal backflow pattern</p> <p>Deterioration: increased area of dermal backflow OR increased severity of dermal backflow pattern</p> |

Table 3. Overview of measurement method and calculation of the secondary outcomes

| Outcome parameter                                                         | Measurement time, method,<br>material                                                                                                                                                                                                                      | Calculation                                                                                                                                                                                               |
|---------------------------------------------------------------------------|------------------------------------------------------------------------------------------------------------------------------------------------------------------------------------------------------------------------------------------------------------|-----------------------------------------------------------------------------------------------------------------------------------------------------------------------------------------------------------|
| <i>Incidence of lymphedema based on pitting status</i>                    | At 12M, 18M, 24M and 36M.<br>The therapist gives a vertical pressure with the thumb for 5 seconds at the 7 reference points (see figure 3) <sup>15</sup>                                                                                                   | 0 = The skin immediately returns to starting position<br>1 = Pitting is present                                                                                                                           |
| <i>Incidence of lymphedema based on skinfold thickness</i>                | At 12M, 18M, 24M and 36M.<br>The examiner picks up the skinfolds between thumb and index finger at the 7 reference points (see figure 3). <sup>19</sup> The skinfold thickness of the edematous side is compared to the non-edematous side (Stemmer sign). | 0 = No increase in skinfold thickness<br>1 = An increase in skinfold thickness                                                                                                                            |
| <i>Incidence of lymphedema based on the amount of extracellular fluid</i> | Before surgery, at 12M, 18M, 24M and 36M.<br>Impedimed L-dex U400 <sup>16</sup><br>Reference points<br>On each hand, one double electrode is placed on the dorsum of the hand<br>On the right foot, one double                                             | 0= Patients with a score of <10 L-Dex units or with an increase of < 10 units from baseline<br>1 = Patients with a score of >10 L-Dex units or with an increase of ≥ 10 units from baseline <sup>31</sup> |

|                                                           |                                                                                                                                               |                                                                                                                                                                                                                                                                                                                                |
|-----------------------------------------------------------|-----------------------------------------------------------------------------------------------------------------------------------------------|--------------------------------------------------------------------------------------------------------------------------------------------------------------------------------------------------------------------------------------------------------------------------------------------------------------------------------|
|                                                           | electrode is placed on the<br>dorsum of the foot.                                                                                             |                                                                                                                                                                                                                                                                                                                                |
| <i>Incidence of lymphedema based on the water content</i> | At 12M, 18M, 24M and 36M.<br>MoistureMeter D Compact (Delfin Technologies)<br>measured at the 7 reference points (see figure 3) <sup>18</sup> | Ratio PWC =<br>PWC healthy side / PWC affected side<br>0 = ratio PWC < 1.2<br>1 = ratio PWC ≥ 1.2                                                                                                                                                                                                                              |
| <i>Relative change of arm volume difference (in %)</i>    | Before surgery, at 12M, 18M, 24M and 36M.                                                                                                     | Relative arm volume difference = relative volume difference at assessment – relative volume difference at baseline<br>See table 2 for further explanation.                                                                                                                                                                     |
| <i>Severity of disturbance of lymphatic transport</i>     | At 12M, 18M, 24M and 36M<br>With lymphofluoroscopy,<br>protocol see table 1.                                                                  | For every region (fingers, ventral/dorsal hand, proximal/distal ventral/dorsal lower and upper arm, breast and dorsal region) the presence of linear, splash, stardust or diffuse pattern is scored.<br>0= linear pattern<br>1= splash pattern<br>2= stardust pattern<br>3= diffuse pattern<br><br>Maximum score is 39 points. |
| <i>Problems in functioning related to development</i>     | At 12M, 18M, 24M and 36M.<br>Using Lymf-ICF questionnaire <sup>37</sup>                                                                       | Total score and physical function score, mental function score, household activities score,                                                                                                                                                                                                                                    |

|                                                                                                                                                                                                                                                                                                                                                                                                 |                                                                                                                             |                                                                                                                                        |
|-------------------------------------------------------------------------------------------------------------------------------------------------------------------------------------------------------------------------------------------------------------------------------------------------------------------------------------------------------------------------------------------------|-----------------------------------------------------------------------------------------------------------------------------|----------------------------------------------------------------------------------------------------------------------------------------|
| <p>1<br/>2<br/>3 of lymphedema (score 0-<br/>4<br/>5 100)<br/>6<br/>7<br/>8<br/>9<br/>10</p>                                                                                                                                                                                                                                                                                                    | <p>Filled out by patient</p>                                                                                                | <p>mobility activities score and life and social<br/>activities score<br/>A lower score indicates less problems in<br/>functioning</p> |
| <p>11<br/>12 Health related quality of<br/>13<br/>14 life<br/>15<br/>16<br/>17<br/>18<br/>19<br/>20<br/>21<br/>22<br/>23<br/>24<br/>25<br/>26<br/>27<br/>28<br/>29<br/>30<br/>31<br/>32<br/>33<br/>34<br/>35<br/>36<br/>37<br/>38<br/>39<br/>40<br/>41<br/>42<br/>43<br/>44<br/>45<br/>46<br/>47<br/>48<br/>49<br/>50<br/>51<br/>52<br/>53<br/>54<br/>55<br/>56<br/>57<br/>58<br/>59<br/>60</p> | <p>At 12M, 18M, 24M and 36M.<br/>Using Mc Gill questionnaire<sup>38</sup><br/>(Dutch version)<br/>Filled out by patient</p> | <p>A lower score indicates a lower Quality of Life</p>                                                                                 |



Figure 1. Flow of participants

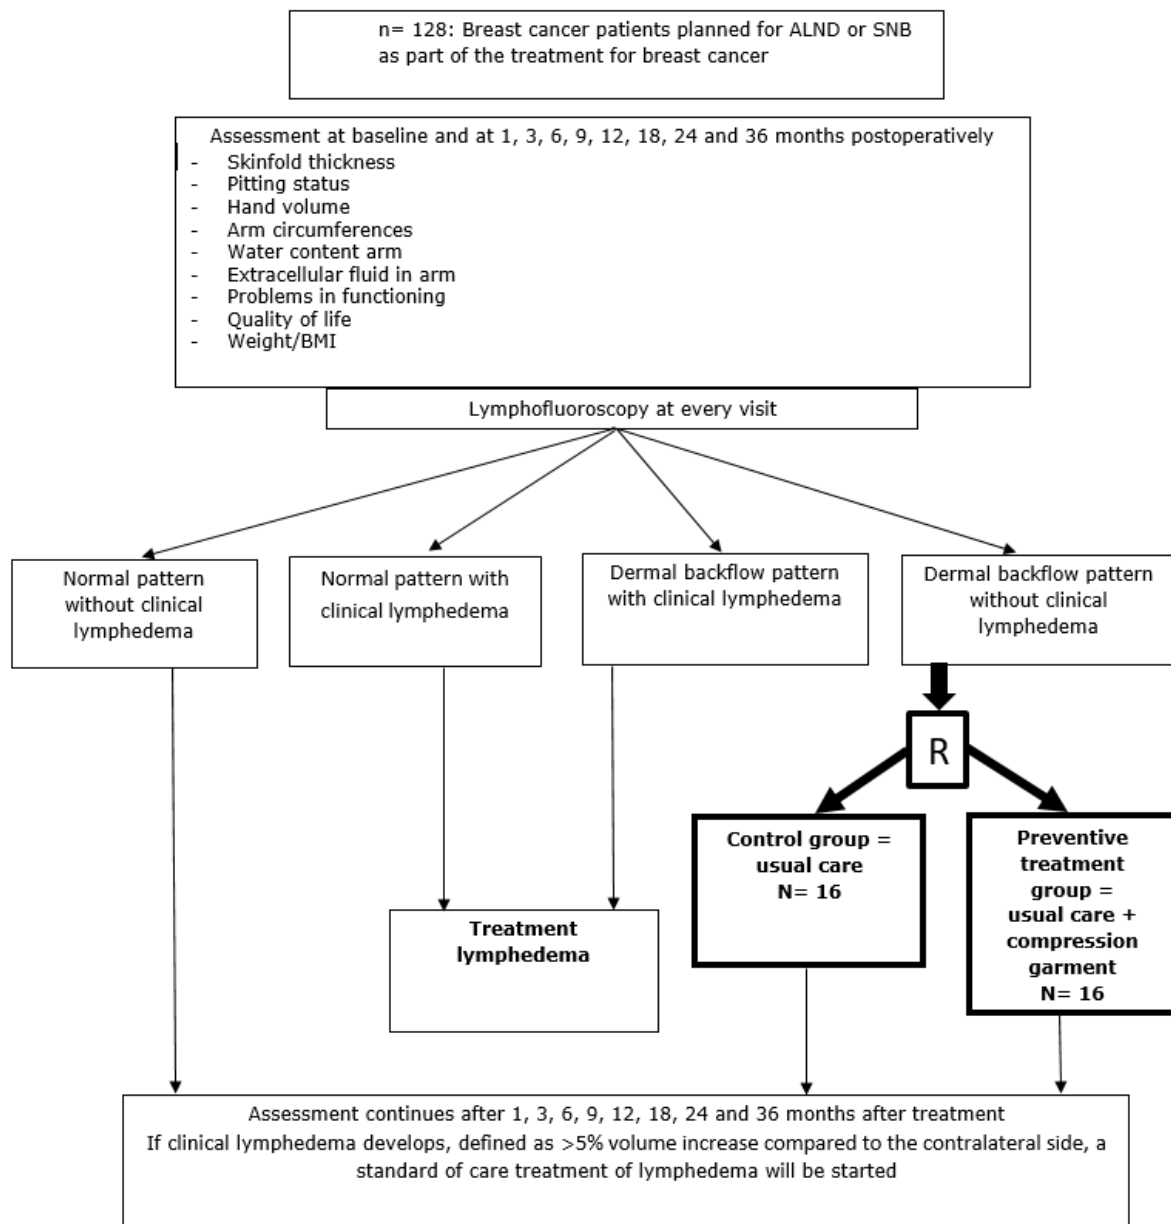

Figure 2. Example of body diagram



Figure 3: Description of the reference points needed for the local clinical assessments

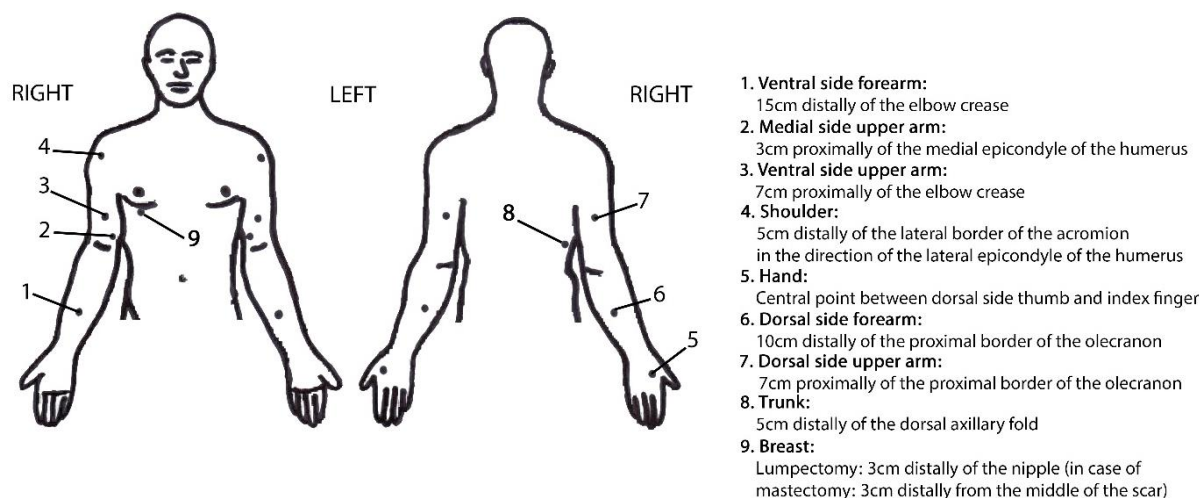

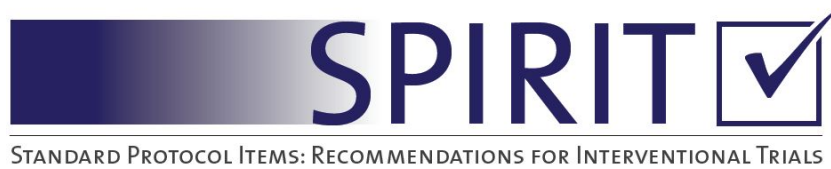

STANDARD PROTOCOL ITEMS: RECOMMENDATIONS FOR INTERVENTIONAL TRIALS

SPIRIT 2013 Checklist: Recommended items to address in a clinical trial protocol and related documents\*

| Section/item                      | Item No | Description                                                                                                                                                                                                                                                                              |
|-----------------------------------|---------|------------------------------------------------------------------------------------------------------------------------------------------------------------------------------------------------------------------------------------------------------------------------------------------|
| <b>Administrative information</b> |         |                                                                                                                                                                                                                                                                                          |
| Title                             | 1       | Descriptive title identifying the study design, population, interventions, and, if applicable, trial acronym                                                                                                                                                                             |
| Trial registration                | 2a      | Trial identifier and registry name. If not yet registered, name of intended registry                                                                                                                                                                                                     |
|                                   | 2b      | All items from the World Health Organization Trial Registration Data Set                                                                                                                                                                                                                 |
| Protocol version                  | 3       | Date and version identifier                                                                                                                                                                                                                                                              |
| Funding                           | 4       | Sources and types of financial, material, and other support                                                                                                                                                                                                                              |
| Roles and responsibilities        | 5a      | Names, affiliations, and roles of protocol contributors                                                                                                                                                                                                                                  |
|                                   | 5b      | Name and contact information for the trial sponsor                                                                                                                                                                                                                                       |
|                                   | 5c      | Role of study sponsor and funders, if any, in study design; collection, management, analysis, and interpretation of data; writing of the report; and the decision to submit the report for publication, including whether they will have ultimate authority over any of these activities |
|                                   | 5d      | Composition, roles, and responsibilities of the coordinating centre, steering committee, endpoint adjudication committee, data management team, and other individuals or groups overseeing the trial, if applicable (see Item 21a for data monitoring committee)                         |
| <b>Introduction</b>               |         |                                                                                                                                                                                                                                                                                          |
| Background and rationale          | 6a      | Description of research question and justification for undertaking the trial, including summary of relevant studies (published and unpublished) examining benefits and harms for each intervention                                                                                       |
|                                   | 6b      | Explanation for choice of comparators                                                                                                                                                                                                                                                    |
| Objectives                        | 7       | Specific objectives or hypotheses                                                                                                                                                                                                                                                        |
| Trial design                      | 8       | Description of trial design including type of trial (eg, parallel group, crossover, factorial, single group), allocation ratio, and framework (eg, superiority, equivalence, noninferiority, exploratory)                                                                                |

## Methods: Participants, interventions, and outcomes

|                      |     |                                                                                                                                                                                                                                                                                                                                                                                |
|----------------------|-----|--------------------------------------------------------------------------------------------------------------------------------------------------------------------------------------------------------------------------------------------------------------------------------------------------------------------------------------------------------------------------------|
| Study setting        | 9   | Description of study settings (eg, community clinic, academic hospital) and list of countries where data will be collected. Reference to where list of study sites can be obtained                                                                                                                                                                                             |
| Eligibility criteria | 10  | Inclusion and exclusion criteria for participants. If applicable, eligibility criteria for study centres and individuals who will perform the interventions (eg, surgeons, psychotherapists)                                                                                                                                                                                   |
| Interventions        | 11a | Interventions for each group with sufficient detail to allow replication, including how and when they will be administered                                                                                                                                                                                                                                                     |
|                      | 11b | Criteria for discontinuing or modifying allocated interventions for a given trial participant (eg, drug dose change in response to harms, participant request, or improving/worsening disease)                                                                                                                                                                                 |
|                      | 11c | Strategies to improve adherence to intervention protocols, and any procedures for monitoring adherence (eg, drug tablet return, laboratory tests)                                                                                                                                                                                                                              |
|                      | 11d | Relevant concomitant care and interventions that are permitted or prohibited during the trial                                                                                                                                                                                                                                                                                  |
| Outcomes             | 12  | Primary, secondary, and other outcomes, including the specific measurement variable (eg, systolic blood pressure), analysis metric (eg, change from baseline, final value, time to event), method of aggregation (eg, median, proportion), and time point for each outcome. Explanation of the clinical relevance of chosen efficacy and harm outcomes is strongly recommended |
| Participant timeline | 13  | Time schedule of enrolment, interventions (including any run-ins and washouts), assessments, and visits for participants. A schematic diagram is highly recommended (see Figure)                                                                                                                                                                                               |
| Sample size          | 14  | Estimated number of participants needed to achieve study objectives and how it was determined, including clinical and statistical assumptions supporting any sample size calculations                                                                                                                                                                                          |
| Recruitment          | 15  | Strategies for achieving adequate participant enrolment to reach target sample size                                                                                                                                                                                                                                                                                            |

## Methods: Assignment of interventions (for controlled trials)

### Allocation:

|                     |     |                                                                                                                                                                                                                                                                                                                                                          |
|---------------------|-----|----------------------------------------------------------------------------------------------------------------------------------------------------------------------------------------------------------------------------------------------------------------------------------------------------------------------------------------------------------|
| Sequence generation | 16a | Method of generating the allocation sequence (eg, computer-generated random numbers), and list of any factors for stratification. To reduce predictability of a random sequence, details of any planned restriction (eg, blocking) should be provided in a separate document that is unavailable to those who enrol participants or assign interventions |
|---------------------|-----|----------------------------------------------------------------------------------------------------------------------------------------------------------------------------------------------------------------------------------------------------------------------------------------------------------------------------------------------------------|

|    |                |     |                                                                         |
|----|----------------|-----|-------------------------------------------------------------------------|
| 1  |                |     |                                                                         |
| 2  | Allocation     | 16b | Mechanism of implementing the allocation sequence (eg, central          |
| 3  | concealment    |     | telephone; sequentially numbered, opaque, sealed envelopes),            |
| 4  | mechanism      |     | describing any steps to conceal the sequence until interventions are    |
| 5  |                |     | assigned                                                                |
| 6  |                |     |                                                                         |
| 7  | Implementation | 16c | Who will generate the allocation sequence, who will enrol participants, |
| 8  |                |     | and who will assign participants to interventions                       |
| 9  |                |     |                                                                         |
| 10 | Blinding       | 17a | Who will be blinded after assignment to interventions (eg, trial        |
| 11 | (masking)      |     | participants, care providers, outcome assessors, data analysts), and    |
| 12 |                |     | how                                                                     |
| 13 |                | 17b | If blinded, circumstances under which unblinding is permissible, and    |
| 14 |                |     | procedure for revealing a participant's allocated intervention during   |
| 15 |                |     | the trial                                                               |
| 16 |                |     |                                                                         |
| 17 |                |     |                                                                         |
| 18 |                |     |                                                                         |
| 19 |                |     |                                                                         |

### Methods: Data collection, management, and analysis

|    |                 |     |                                                                          |
|----|-----------------|-----|--------------------------------------------------------------------------|
| 20 |                 |     |                                                                          |
| 21 | Data collection | 18a | Plans for assessment and collection of outcome, baseline, and other      |
| 22 | methods         |     | trial data, including any related processes to promote data quality (eg, |
| 23 |                 |     | duplicate measurements, training of assessors) and a description of      |
| 24 |                 |     | study instruments (eg, questionnaires, laboratory tests) along with      |
| 25 |                 |     | their reliability and validity, if known. Reference to where data        |
| 26 |                 |     | collection forms can be found, if not in the protocol                    |
| 27 |                 | 18b | Plans to promote participant retention and complete follow-up,           |
| 28 |                 |     | including list of any outcome data to be collected for participants who  |
| 29 |                 |     | discontinue or deviate from intervention protocols                       |
| 30 |                 |     |                                                                          |
| 31 | Data            | 19  | Plans for data entry, coding, security, and storage, including any       |
| 32 | management      |     | related processes to promote data quality (eg, double data entry;        |
| 33 |                 |     | range checks for data values). Reference to where details of data        |
| 34 |                 |     | management procedures can be found, if not in the protocol               |
| 35 |                 |     |                                                                          |
| 36 | Statistical     | 20a | Statistical methods for analysing primary and secondary outcomes.        |
| 37 | methods         |     | Reference to where other details of the statistical analysis plan can be |
| 38 |                 |     | found, if not in the protocol                                            |
| 39 |                 | 20b | Methods for any additional analyses (eg, subgroup and adjusted           |
| 40 |                 |     | analyses)                                                                |
| 41 |                 | 20c | Definition of analysis population relating to protocol non-adherence     |
| 42 |                 |     | (eg, as randomised analysis), and any statistical methods to handle      |
| 43 |                 |     | missing data (eg, multiple imputation)                                   |
| 44 |                 |     |                                                                          |
| 45 |                 |     |                                                                          |
| 46 |                 |     |                                                                          |
| 47 |                 |     |                                                                          |
| 48 |                 |     |                                                                          |
| 49 |                 |     |                                                                          |
| 50 |                 |     |                                                                          |
| 51 |                 |     |                                                                          |

### Methods: Monitoring

|    |                 |     |                                                                      |
|----|-----------------|-----|----------------------------------------------------------------------|
| 52 |                 |     |                                                                      |
| 53 | Data monitoring | 21a | Composition of data monitoring committee (DMC); summary of its role  |
| 54 |                 |     | and reporting structure; statement of whether it is independent from |
| 55 |                 |     | the sponsor and competing interests; and reference to where further  |
| 56 |                 |     | details about its charter can be found, if not in the protocol.      |
| 57 |                 |     | Alternatively, an explanation of why a DMC is not needed             |
| 58 |                 |     |                                                                      |
| 59 |                 |     |                                                                      |
| 60 |                 |     |                                                                      |

|    |          |     |                                                                        |
|----|----------|-----|------------------------------------------------------------------------|
| 1  |          | 21b | Description of any interim analyses and stopping guidelines, including |
| 2  |          |     | who will have access to these interim results and make the final       |
| 3  |          |     | decision to terminate the trial                                        |
| 4  |          |     |                                                                        |
| 5  |          |     |                                                                        |
| 6  | Harms    | 22  | Plans for collecting, assessing, reporting, and managing solicited and |
| 7  |          |     | spontaneously reported adverse events and other unintended effects     |
| 8  |          |     | of trial interventions or trial conduct                                |
| 9  |          |     |                                                                        |
| 10 |          |     |                                                                        |
| 11 | Auditing | 23  | Frequency and procedures for auditing trial conduct, if any, and       |
| 12 |          |     | whether the process will be independent from investigators and the     |
| 13 |          |     | sponsor                                                                |
| 14 |          |     |                                                                        |

### Ethics and dissemination

|    |                   |     |                                                                               |
|----|-------------------|-----|-------------------------------------------------------------------------------|
| 15 |                   |     |                                                                               |
| 16 |                   |     |                                                                               |
| 17 | Research ethics   | 24  | Plans for seeking research ethics committee/institutional review board        |
| 18 | approval          |     | (REC/IRB) approval                                                            |
| 19 |                   |     |                                                                               |
| 20 |                   |     |                                                                               |
| 21 | Protocol          | 25  | Plans for communicating important protocol modifications (eg,                 |
| 22 | amendments        |     | changes to eligibility criteria, outcomes, analyses) to relevant parties      |
| 23 |                   |     | (eg, investigators, REC/IRBs, trial participants, trial registries, journals, |
| 24 |                   |     | regulators)                                                                   |
| 25 |                   |     |                                                                               |
| 26 | Consent or assent | 26a | Who will obtain informed consent or assent from potential trial               |
| 27 |                   |     | participants or authorised surrogates, and how (see Item 32)                  |
| 28 |                   |     |                                                                               |
| 29 |                   | 26b | Additional consent provisions for collection and use of participant data      |
| 30 |                   |     | and biological specimens in ancillary studies, if applicable                  |
| 31 |                   |     |                                                                               |
| 32 |                   |     |                                                                               |
| 33 | Confidentiality   | 27  | How personal information about potential and enrolled participants will       |
| 34 |                   |     | be collected, shared, and maintained in order to protect confidentiality      |
| 35 |                   |     | before, during, and after the trial                                           |
| 36 |                   |     |                                                                               |
| 37 | Declaration of    | 28  | Financial and other competing interests for principal investigators for       |
| 38 | interests         |     | the overall trial and each study site                                         |
| 39 |                   |     |                                                                               |
| 40 |                   |     |                                                                               |
| 41 | Access to data    | 29  | Statement of who will have access to the final trial dataset, and             |
| 42 |                   |     | disclosure of contractual agreements that limit such access for               |
| 43 |                   |     | investigators                                                                 |
| 44 |                   |     |                                                                               |
| 45 | Ancillary and     | 30  | Provisions, if any, for ancillary and post-trial care, and for                |
| 46 | post-trial care   |     | compensation to those who suffer harm from trial participation                |
| 47 |                   |     |                                                                               |
| 48 | Dissemination     | 31a | Plans for investigators and sponsor to communicate trial results to           |
| 49 | policy            |     | participants, healthcare professionals, the public, and other relevant        |
| 50 |                   |     | groups (eg, via publication, reporting in results databases, or other         |
| 51 |                   |     | data sharing arrangements), including any publication restrictions            |
| 52 |                   |     |                                                                               |
| 53 |                   | 31b | Authorship eligibility guidelines and any intended use of professional        |
| 54 |                   |     | writers                                                                       |
| 55 |                   |     |                                                                               |
| 56 |                   |     |                                                                               |
| 57 |                   | 31c | Plans, if any, for granting public access to the full protocol, participant-  |
| 58 |                   |     | level dataset, and statistical code                                           |
| 59 |                   |     |                                                                               |
| 60 |                   |     |                                                                               |

**Appendices**

|                            |    |                                                                                                                                                                                                |
|----------------------------|----|------------------------------------------------------------------------------------------------------------------------------------------------------------------------------------------------|
| Informed consent materials | 32 | Model consent form and other related documentation given to participants and authorised surrogates                                                                                             |
| Biological specimens       | 33 | Plans for collection, laboratory evaluation, and storage of biological specimens for genetic or molecular analysis in the current trial and for future use in ancillary studies, if applicable |

---

\*It is strongly recommended that this checklist be read in conjunction with the SPIRIT 2013 Explanation & Elaboration for important clarification on the items. Amendments to the protocol should be tracked and dated. The SPIRIT checklist is copyrighted by the SPIRIT Group under the Creative Commons "[Attribution-NonCommercial-NoDerivs 3.0 Unported](#)" license.

For peer review only
